# Supplementary material for: Secondary Metabolites and Biosynthetic Gene Clusters Analysis of Deep-Sea Hydrothermal Vent-Derived Streptomyces sp. SCSIO ZS0520
Source: MDPI journal article supplement (doi:10.3390/md20060393), 2022-06-14

## Supporting Information

### Secondary Metabolites and Biosynthetic Gene Clusters Analysis of Deep-sea Hydrothermal Vent-Derived *Streptomyces* sp. SCSIO ZS0520

Huaran Zhang<sup>1,2,3</sup>, Yingying Chen<sup>1</sup>, Yanqing Li<sup>1,2,3</sup>, Yongxiang Song<sup>1</sup>, Junying Ma<sup>1,2,3</sup> and Jianhua Ju<sup>1,2,3\*</sup>

<sup>1</sup> Southern Marine Science and Engineering Guangdong Laboratory (Guangzhou), No.1119, Haibin Rd., Nansha District, Guangzhou 511458, China; aifyui@126.com (H.Z.); chenyingying7788@163.com (Y.C.); liyanqing20@mails.ucas.ac.cn (Y.L.); songx@scsio.ac.cn (Y.S.); majunying@scsio.ac.cn (J.M.)

<sup>2</sup> CAS Key Laboratory of Tropical Marine Bio-Resources and Ecology, Guangdong Key Laboratory of Marine Materia Medica, RNAM Center for Marine Microbiology, South China Sea Institute of Oceanology, Chinese Academy of Sciences, 164 West Xingang Road, Guangzhou 510301, China

<sup>3</sup> College of Oceanology, University of Chinese Academy of Sciences, Qingdao 266400, China

\* Correspondence: jjju@scsio.ac.cn (J.J.); Tel./Fax: +86-20-8902-3028

# Table of Contents

|                                                                                                                                                                                 |    |
|---------------------------------------------------------------------------------------------------------------------------------------------------------------------------------|----|
| <b>Table S1.</b> Summary of $^1\text{H}$ (700 MHz) and $^{13}\text{C}$ NMR (175 MHz) data for compounds <b>2</b> , <b>3</b> , and <b>4</b> ( $\delta$ in ppm, $J$ in Hz). ....  | 3  |
| <b>Table S2.</b> Summary of $^1\text{H}$ (700 MHz) and $^{13}\text{C}$ NMR (175 MHz) data for compounds <b>5</b> , <b>6</b> , and <b>10</b> ( $\delta$ in ppm, $J$ in Hz). .... | 4  |
| <b>Table S3.</b> The antiSMASH-predicted BGCs for <i>Streptomyces</i> sp. SCSIO ZS0520 (the isolated compounds were marked by asterisks). ....                                  | 5  |
| <b>Table S4.</b> Deduced functions of <i>orfs</i> in the <i>sln</i> BGC. ....                                                                                                   | 6  |
| <b>Table S5.</b> Deduced functions of <i>orfs</i> in the <i>ela</i> BGC. ....                                                                                                   | 7  |
| <b>Table S6.</b> Deduced functions of <i>orfs</i> in the <i>hpn</i> BGC. ....                                                                                                   | 8  |
| <b>Figure S1.</b> The Selected HMBC and $^1\text{H}$ - $^1\text{H}$ COSY of new compounds isolated from <i>Streptomyces</i> sp. SCSIO ZS0520. ....                              | 9  |
| <b>Figure S2.</b> The taxonomic classification of ZS0520 genome inferred by the Microbial Genomes Atlas (MiGA) found against all the genomes in the database. ....              | 10 |
| <b>Figure S3.</b> The potential degradation mechanisms of salinomycin. ....                                                                                                     | 1  |
| <b>Figure S4.</b> HRESIMS spectrum of <i>seco</i> -salinomycin A and B ( <b>2</b> and <b>3</b> ). ....                                                                          | 1  |
| <b>Figure S5.</b> $^1\text{H}$ NMR (700 MHz, $\text{DMSO}-d_6$ ) spectrum of <i>seco</i> -salinomycin A and B ( <b>2</b> and <b>3</b> ). ....                                   | 1  |
| <b>Figure S6.</b> $^{13}\text{C}$ NMR (175 MHz, $\text{DMSO}-d_6$ ) spectrum of <i>seco</i> -salinomycin A and B ( <b>2</b> and <b>3</b> ). ....                                | 2  |
| <b>Figure S7.</b> $^{13}\text{C}$ -DEPT (150 MHz, $\text{DMSO}-d_6$ ) spectrum of <i>seco</i> -salinomycin A and B ( <b>2</b> and <b>3</b> ). ....                              | 2  |
| <b>Figure S8.</b> $^1\text{H}$ - $^1\text{H}$ COSY spectrum of <i>seco</i> -salinomycin A and B ( <b>2</b> and <b>3</b> ). ....                                                 | 3  |
| <b>Figure S9.</b> HSQC spectrum of <i>seco</i> -salinomycin A and B ( <b>2</b> and <b>3</b> ). ....                                                                             | 3  |
| <b>Figure S10.</b> HMBC spectrum of <i>seco</i> -salinomycin A and B ( <b>2</b> and <b>3</b> ). ....                                                                            | 4  |
| <b>Figure S11.</b> NOESY spectrum of <i>seco</i> -salinomycin A and B ( <b>2</b> and <b>3</b> ). ....                                                                           | 4  |
| <b>Figure S12.</b> HRESIMS spectrum of <i>seco</i> -salinomycin C ( <b>4</b> ). ....                                                                                            | 5  |
| <b>Figure S13.</b> $^1\text{H}$ NMR (700 MHz, $\text{CDCl}_3$ ) spectrum of <i>seco</i> -salinomycin C ( <b>4</b> ). ....                                                       | 5  |
| <b>Figure S14.</b> $^{13}\text{C}$ NMR (175 MHz, $\text{CDCl}_3$ ) spectrum of <i>seco</i> -salinomycin C ( <b>4</b> ). ....                                                    | 6  |
| <b>Figure S15.</b> $^{13}\text{C}$ -DEPT (175 MHz, $\text{CDCl}_3$ ) spectrum of <i>seco</i> -salinomycin C ( <b>4</b> ). ....                                                  | 6  |
| <b>Figure S16.</b> $^1\text{H}$ - $^1\text{H}$ COSY spectrum of <i>seco</i> -salinomycin C ( <b>4</b> ). ....                                                                   | 7  |
| <b>Figure S17.</b> HSQC spectrum of <i>seco</i> -salinomycin C ( <b>4</b> ). ....                                                                                               | 7  |
| <b>Figure S18.</b> HMBC spectrum of <i>seco</i> -salinomycin C ( <b>4</b> ). ....                                                                                               | 8  |

|                                                                                                                                                                   |    |
|-------------------------------------------------------------------------------------------------------------------------------------------------------------------|----|
| <b>Figure S19.</b> NOESY spectrum of <i>seco</i> -salinomycin C ( <b>4</b> ). .....                                                                               | 8  |
| <b>Figure S20.</b> HRESIMS spectrum of <i>seco</i> -salinomycin D and E ( <b>5</b> and <b>6</b> ). .....                                                          | 9  |
| <b>Figure S21.</b> <sup>1</sup> H NMR (700 MHz, methanol- <i>d</i> <sub>4</sub> ) spectrum of <i>seco</i> -salinomycin D and E ( <b>5</b> and <b>6</b> ). .....   | 9  |
| <b>Figure S22.</b> <sup>13</sup> C NMR (175 MHz, methanol- <i>d</i> <sub>4</sub> ) spectrum of <i>seco</i> -salinomycin D and E ( <b>5</b> and <b>6</b> ). .....  | 10 |
| <b>Figure S23.</b> <sup>13</sup> C-DEPT (175 MHz, methanol- <i>d</i> <sub>4</sub> ) spectrum of <i>seco</i> -salinomycin D and E ( <b>5</b> and <b>6</b> ). ..... | 10 |
| <b>Figure S24.</b> <sup>1</sup> H- <sup>1</sup> H COSY spectrum of <i>seco</i> -salinomycin D and E ( <b>5</b> and <b>6</b> ). .....                              | 11 |
| <b>Figure S25.</b> HSQC spectrum of <i>seco</i> -salinomycin D and E ( <b>5</b> and <b>6</b> ). .....                                                             | 11 |
| <b>Figure S26.</b> HMBC spectrum of <i>seco</i> -salinomycin D and E ( <b>5</b> and <b>6</b> ). .....                                                             | 12 |
| <b>Figure S27.</b> NOESY spectrum of <i>seco</i> -salinomycin D and E ( <b>5</b> and <b>6</b> ). .....                                                            | 12 |
| <b>Figure S28.</b> HRESIMS spectrum of minipyrone ( <b>10</b> ). .....                                                                                            | 13 |
| <b>Figure S29.</b> <sup>1</sup> H NMR (700 MHz, methanol- <i>d</i> <sub>4</sub> ) spectrum of minipyrone ( <b>10</b> ). .....                                     | 13 |
| <b>Figure S30.</b> <sup>13</sup> C NMR (175MHz, methanol- <i>d</i> <sub>4</sub> ) spectrum of minipyrone ( <b>10</b> ). .....                                     | 14 |
| <b>Figure S31.</b> <sup>13</sup> C-DEPT NMR (175 MHz, methanol- <i>d</i> <sub>4</sub> ) spectrum of minipyrone ( <b>10</b> ). .....                               | 14 |
| <b>Figure S32.</b> <sup>1</sup> H- <sup>1</sup> H COSY spectrum of minipyrone ( <b>10</b> ). .....                                                                | 15 |
| <b>Figure S33.</b> HSQC spectrum of minipyrone ( <b>10</b> ). .....                                                                                               | 15 |
| <b>Figure S34.</b> HMBC spectrum of minipyrone ( <b>10</b> ). .....                                                                                               | 16 |
| <b>Figure S35.</b> NOESY spectrum of minipyrone ( <b>10</b> ). .....                                                                                              | 16 |
| <b>Figure S36.</b> The HPLC-DAD and HRESIMS data of crude extract from <i>Streptomyces</i> sp. SCSIO ZS0520. ....                                                 | 17 |

**Table S1.** Summary of  $^1\text{H}$  (700 MHz) and  $^{13}\text{C}$  NMR (175 MHz) data for compounds **2**, **3**, and **4** ( $\delta$  in ppm,  $J$  in Hz).

| No. | 2 and 3 <sup>a</sup>                     |                            |                                          |                            | 4 <sup>b</sup>                                    |                            |
|-----|------------------------------------------|----------------------------|------------------------------------------|----------------------------|---------------------------------------------------|----------------------------|
|     | $\delta_{\text{H}}$ , mult. ( $J$ in Hz) | $\delta_{\text{C}}$ , type | $\delta_{\text{H}}$ , mult. ( $J$ in Hz) | $\delta_{\text{C}}$ , type | $\delta_{\text{H}}$ , mult. ( $J$ in Hz)          | $\delta_{\text{C}}$ , type |
| 1   | -                                        | 178.9, C                   | -                                        | 179.0, C                   | -                                                 | 180.0, C                   |
| 2   | 2.67, m                                  | 49.0, CH                   | 2.67, m                                  | 48.9, CH                   | 2.89, m                                           | 49.0, CH                   |
| 3   | 3.70, m                                  | 75.4, CH                   | 3.70, m                                  | 75.4, CH                   | 4.02 dd (11.1, 6.0)                               | 75.8, CH                   |
| 4   | <i>a</i> 1.68, m<br><i>b</i> 1.33, m     | 20.2, CH <sub>2</sub>      | <i>a</i> 1.68, m<br><i>b</i> 1.33, m     | 20.2, CH <sub>2</sub>      | <i>a</i> 1.45, m<br><i>b</i> 1.90, m              | 19.8, CH <sub>2</sub>      |
| 5   | <i>a</i> 1.33, m<br><i>b</i> 1.72, m     | 26.4, CH <sub>2</sub>      | <i>a</i> 1.33, m<br><i>b</i> 1.72, m     | 26.4, CH <sub>2</sub>      | <i>a</i> 1.45, m<br><i>b</i> 1.80, m              | 26.3, CH <sub>2</sub>      |
| 6   | 1.72, m                                  | 27.1, CH                   | 1.72, m                                  | 27.2, CH                   | 1.80, m                                           | 28.2, CH                   |
| 7   | 3.56, m                                  | 70.8, CH                   | 3.56, m                                  | 70.7, CH                   | 3.69 d (10.1, 1.7)                                | 71.1, CH                   |
| 8   | 1.33, m                                  | 36.7, CH                   | 1.33, m                                  | 36.6, CH                   | 1.49, m                                           | 36.5, CH                   |
| 9   | 3.80, m                                  | 71.7, CH                   | 3.80, m                                  | 71.7, CH                   | 4.09, dd (10.2, 1.1)                              | 69.8, CH                   |
| 10  | 2.81, m                                  | 47.3, CH                   | 2.81, m                                  | 47.1, CH                   | 2.89, m                                           | 48.5, CH                   |
| 11  | -                                        | 216.0, C                   | -                                        | 215.6, C                   | -                                                 | 215.4, C                   |
| 12  | 2.92, m                                  | 54.2, CH                   | 2.92, m                                  | 54.2, CH                   | 2.89, m                                           | 54.9, CH                   |
| 13  | 4.02, dd (8.9, 3.3)                      | 75.9, CH                   | 4.00, dd (8.9, 3.3)                      | 75.9, CH                   | 4.04, dd (7.1, 5.1)                               | 76.4, CH                   |
| 14  | 1.93, m                                  | 28.1, CH                   | 1.93, m                                  | 28.1, CH                   | 2.00, m                                           | 28.1, CH                   |
| 15  | <i>a</i> 2.40, m<br><i>b</i> 1.72, m     | 33.3, CH <sub>2</sub>      | <i>a</i> 2.40, m<br><i>b</i> 1.72, m     | 33.5, CH <sub>2</sub>      | <i>a</i> 2.33, dd (19.3, 6.2)<br><i>b</i> 1.90, m | 35.9, CH <sub>2</sub>      |
| 16  | -                                        | 119.5, C                   | -                                        | 119.1, C                   | -                                                 | 120.5, C                   |
| 17  | -                                        | 142.2, C                   | -                                        | 142.2, C                   | -                                                 | 143.3, C                   |
| 18  | 7.32, d (15.2)                           | 133.9, CH                  | 7.33, d (15.2)                           | 133.9, CH                  | 7.23, d (14.9)                                    | 143.0, CH                  |
| 19  | 6.78, d (15.2)                           | 119.1, CH                  | 6.78, d (15.2)                           | 119.1, CH                  | 6.43, dd (14.9, 8.4)                              | 126.9, CH                  |
| 20  | -                                        | 196.8, C                   | -                                        | 196.5, C                   | 9.56, d (8.4)                                     | 194.9, CH                  |
| 21  | -                                        | 105.9, C                   | -                                        | 105.6, C                   | 1.83, s                                           | 17.9, CH <sub>3</sub>      |
| 22  | 2.37, m                                  | 35.1, CH <sub>2</sub>      | 2.37, m                                  | 34.4, CH <sub>2</sub>      | 1.01, d (6.8)                                     | 17.8, CH <sub>3</sub>      |
| 23  | 1.61, m                                  | 33.5, CH <sub>2</sub>      | 1.61, m                                  | 34.9, CH <sub>2</sub>      | <i>a</i> 1.90, m<br><i>b</i> 1.49, m              | 17.4, CH <sub>2</sub>      |
| 24  | -                                        | 87.0, C                    | -                                        | 86.7, C                    | 0.85, t (7.4)                                     | 11.6, CH <sub>3</sub>      |
| 25  | 3.25, m                                  | 72.9, CH                   | 3.43, m                                  | 74.6, CH                   | 0.87, d (7.0)                                     | 13.4, CH <sub>3</sub>      |
| 26  | 1.63, m                                  | 20.2, CH <sub>2</sub>      | 1.63, m                                  | 19.5, CH <sub>2</sub>      | 0.74, d (6.9)                                     | 7.1, CH <sub>3</sub>       |
| 27  | <i>a</i> 1.47, m<br><i>b</i> 1.41, m     | 29.9, CH <sub>2</sub>      | <i>a</i> 1.47, m<br><i>b</i> 1.41, m     | 29.7, CH <sub>2</sub>      | 0.95, d (5.0)                                     | 11.1, CH <sub>3</sub>      |
| 28  | -                                        | 70.0, C                    | -                                        | 70.1, C                    | <i>a</i> 1.49, m<br><i>b</i> 1.32, m              | 22.5, CH <sub>2</sub>      |
| 29  | 3.63, q (6.8)                            | 76.3, CH                   | 3.56, q (6.8)                            | 76.1, CH                   | 0.95, t (5.6)                                     | 12.2, CH <sub>3</sub>      |
| 30  | 1.04, d (6.9)                            | 15.4, CH <sub>3</sub>      | 1.09, d (6.9)                            | 15.1, CH <sub>3</sub>      |                                                   |                            |
| 31  | 1.15, q (7.5)                            | 31.9, CH <sub>2</sub>      | 1.18, q (7.5)                            | 31.8, CH <sub>2</sub>      |                                                   |                            |
| 32  | 0.77, t (7.5)                            | 6.9, CH <sub>3</sub>       | 0.77, t (7.5)                            | 6.9, CH <sub>3</sub>       |                                                   |                            |
| 33  | 1.19, s                                  | 23.8, CH <sub>3</sub>      | 1.01, s                                  | 21.3, CH <sub>3</sub>      |                                                   |                            |
| 34  | 1.76, s                                  | 18.2, CH <sub>3</sub>      | 1.76, s                                  | 18.3, CH <sub>3</sub>      |                                                   |                            |
| 35  | 0.91, d (7.1)                            | 19.6, CH <sub>3</sub>      | 0.90, d (7.1)                            | 19.6, CH <sub>3</sub>      |                                                   |                            |
| 36  | 1.61, m                                  | 18.9, CH <sub>2</sub>      | 1.61, m                                  | 18.9, CH <sub>2</sub>      |                                                   |                            |
| 37  | 0.75, t (7.1)                            | 10.6, CH <sub>3</sub>      | 0.75, t (7.1)                            | 10.4, CH <sub>3</sub>      |                                                   |                            |
| 38  | 0.70, d (7.0)                            | 13.8, CH <sub>3</sub>      | 0.69, d (7.0)                            | 13.8, CH <sub>3</sub>      |                                                   |                            |
| 39  | 0.61, d (6.6)                            | 7.7, CH <sub>3</sub>       | 0.60, d (6.6)                            | 7.6, CH <sub>3</sub>       |                                                   |                            |
| 40  | 0.81, d (7.0)                            | 11.6, CH <sub>3</sub>      | 0.80, d (7.0)                            | 11.6, CH <sub>3</sub>      |                                                   |                            |
| 41  | <i>a</i> 1.33, m<br><i>b</i> 1.59, m     | 22.9, CH <sub>2</sub>      | <i>a</i> 1.33, m<br><i>b</i> 1.59, m     | 23.0, CH <sub>2</sub>      |                                                   |                            |
| 42  | 0.77, t (7.5)                            | 12.7, CH <sub>3</sub>      | 0.77, t (7.5)                            | 12.7, CH <sub>3</sub>      |                                                   |                            |

<sup>a</sup>Measured in DMSO-*d*<sub>6</sub>, <sup>b</sup>measured in CDCl<sub>3</sub>;



**Table S2.** Summary of  $^1\text{H}$  (700 MHz) and  $^{13}\text{C}$  NMR (175 MHz) data for compounds **5**, **6**, and **10** ( $\delta$  in ppm,  $J$  in Hz).

| No. | <b>5<sup>a</sup></b>                     |                            | <b>6<sup>a</sup></b>                     |                            | <b>10<sup>a</sup></b>                    |                            |
|-----|------------------------------------------|----------------------------|------------------------------------------|----------------------------|------------------------------------------|----------------------------|
|     | $\delta_{\text{H}}$ , mult. ( $J$ in Hz) | $\delta_{\text{C}}$ , type | $\delta_{\text{H}}$ , mult. ( $J$ in Hz) | $\delta_{\text{C}}$ , type | $\delta_{\text{H}}$ , mult. ( $J$ in Hz) | $\delta_{\text{C}}$ , type |
| 1   | -                                        | 179.2, C                   | -                                        | 179.2, C                   | -                                        | 167.8, C                   |
| 2   | 2.91, m                                  | 51.0, CH                   | 2.91, m                                  | 50.9, CH                   | 6.02, d (2.2)                            | 101.2, CH                  |
| 3   | 3.94, m                                  | 77.2, C                    | 3.94, m                                  | 77.2, C                    | -                                        | 174.0, C                   |
| 4   | <i>a</i> 1.78, m<br><i>b</i> 1.45, m     | 20.9, CH <sub>2</sub>      | <i>a</i> 1.78, m<br><i>b</i> 1.45, m     | 20.9, CH <sub>2</sub>      | 5.52, d (2.2)                            | 88, CH                     |
| 5   | <i>a</i> 1.91, m<br><i>b</i> 1.47, m     | 27.3, CH <sub>2</sub>      | <i>a</i> 1.91, m<br><i>b</i> 1.47, m     | 27.3, CH <sub>2</sub>      | -                                        | 167.7, C                   |
| 6   | 1.83, m                                  | 29.6, CH                   | 1.83, m                                  | 29.6, CH                   | 2.52, t (7.9)                            | 32.4, CH <sub>2</sub>      |
| 7   | 3.78, m                                  | 72.7, CH                   | 3.78, m                                  | 72.7, CH                   | 1.55, m                                  | 36.9, CH <sub>2</sub>      |
| 8   | 1.52, m                                  | 37.8, CH                   | 1.52, m                                  | 37.8, CH                   | 1.60, m                                  | 28.7, CH                   |
| 9   | 4.09, dd (9.8, 6.6)                      | 72.6, C                    | 4.09, dd (9.8, 6.6)                      | 72.5, C                    | 0.95, d (6.5)                            | 22.6, CH <sub>3</sub>      |
| 10  | 2.95, m                                  | 48.9, CH                   | 2.95, m                                  | 48.9, CH                   | 0.95, d (6.5)                            | 22.6, CH <sub>3</sub>      |
| 11  | -                                        | 217.4, C                   | -                                        | 217.5, C                   | 3.84, s                                  | 56.9, CH <sub>3</sub>      |
| 12  | 3.13, m                                  | 56.2, CH                   | 3.13, m                                  | 56.2, CH                   |                                          |                            |
| 13  | 5.33, dd (8.1, 3.7)                      | 75.8, CH                   | 5.33, dd (8.1, 3.7)                      | 75.8, CH                   |                                          |                            |
| 14  | 2.43, m                                  | 33.1, CH                   | 2.43, m                                  | 33.1, CH                   |                                          |                            |
| 15  | <i>a</i> 2.73, m<br><i>b</i> 2.26, m     | 46.2, CH <sub>2</sub>      | <i>a</i> 2.73, m<br><i>b</i> 2.26, m     | 46.2, CH <sub>2</sub>      |                                          |                            |
| 16  | 1.29, m                                  | 23.3, CH <sub>2</sub>      | 1.29, m                                  | 23.3, CH <sub>2</sub>      |                                          |                            |
| 17  | -                                        | 169.9, C                   | -                                        | 172.2, C                   |                                          |                            |
| 18  | 5.57, d (15.3)                           | 112.4, CH                  | 5.55, d (14.9)                           | 112.1, CH                  |                                          |                            |
| 19  | 7.71, dd (15.3, 11.6)                    | 143.4, CH                  | 7.45, dd (14.9, 12.2)                    | 146.4, CH                  |                                          |                            |
| 20  | 5.16, d (11.6)                           | 96.4, CH                   | 5.58, dt (12.2, 1.6)                     | 97.9, CH                   |                                          |                            |
| 21  | -                                        | 169.0, C                   | -                                        | 162.9, C                   |                                          |                            |
| 22  | 2.73, m                                  | 29.1, CH <sub>2</sub>      | 2.73, m                                  | 29.1, CH <sub>2</sub>      |                                          |                            |
| 23  | <i>a</i> 1.78, m<br><i>b</i> 1.69, m     | 32.1, CH <sub>2</sub>      | <i>a</i> 1.78, m<br><i>b</i> 1.69, m     | 32.1, CH <sub>2</sub>      |                                          |                            |
| 24  | -                                        | 92.9, C                    | -                                        | 92.4, C                    |                                          |                            |
| 25  | 3.60, dd (11.5, 2.5)                     | 74.3, CH                   | 3.64, dd (11.5, 2.5)                     | 74.4, CH                   |                                          |                            |
| 26  | <i>a</i> 1.36, m<br><i>b</i> 1.47, m     | 23.9, CH <sub>2</sub>      | <i>a</i> 1.36 m<br><i>b</i> 1.47, m      | 23.9, CH <sub>2</sub>      |                                          |                            |
| 27  | <i>a</i> 1.69, m<br><i>b</i> 1.65, m     | 30.6, CH <sub>2</sub>      | <i>a</i> 1.69, m<br><i>b</i> 1.65, m     | 30.8, CH <sub>2</sub>      |                                          |                            |
| 28  | -                                        | 72.1, C                    | -                                        | 72.1, C                    |                                          |                            |
| 29  | 3.81, q (7.3)                            | 77.6, CH                   | 3.81, q (7.3)                            | 77.6, CH                   |                                          |                            |
| 30  | 1.23, d (7.3)                            | 15.1, CH <sub>3</sub>      | 1.22, d (7.3)                            | 15.0, CH <sub>3</sub>      |                                          |                            |
| 31  | 1.31, q (7.5)                            | 32.6, CH <sub>2</sub>      | 1.30, q (7.5)                            | 32.6, CH <sub>2</sub>      |                                          |                            |
| 32  | 0.89, t (7.5)                            | 6.7, CH <sub>3</sub>       | 0.89, t (7.5)                            | 6.7, CH <sub>3</sub>       |                                          |                            |
| 33  | 1.33, s                                  | 22.2, CH <sub>3</sub>      | 1.30, s                                  | 22.0, CH <sub>3</sub>      |                                          |                            |
| 34  | 1.29, t                                  | 9.3, CH <sub>3</sub>       | 1.29, t                                  | 9.3, CH <sub>3</sub>       |                                          |                            |
| 35  | 0.88, d (7.0)                            | 18.1, CH <sub>3</sub>      | 0.88, d (7.0)                            | 18.1, CH <sub>3</sub>      |                                          |                            |
| 36  | <i>a</i> 1.72, m<br><i>b</i> 1.29, m     | 21.0, CH <sub>2</sub>      | <i>a</i> 1.72, m<br><i>b</i> 1.29, m     | 21.0, CH <sub>2</sub>      |                                          |                            |
| 37  | 0.83, t (7.3)                            | 11.3, CH <sub>3</sub>      | 0.83, t (7.3)                            | 11.4, CH <sub>3</sub>      |                                          |                            |
| 38  | 0.88, d (6.9)                            | 14.1, CH <sub>3</sub>      | 0.88, d (6.9)                            | 14.1, CH <sub>3</sub>      |                                          |                            |
| 39  | 0.79, d (7.0)                            | 7.6, CH <sub>3</sub>       | 0.78, d (7.0)                            | 7.6, CH <sub>3</sub>       |                                          |                            |
| 40  | 0.95, d (7.0)                            | 11.6, CH <sub>3</sub>      | 0.95, d (7.0)                            | 11.6, CH <sub>3</sub>      |                                          |                            |
| 41  | <i>a</i> 1.36, m<br><i>b</i> 1.47, m     | 22.7, CH <sub>2</sub>      | <i>a</i> 1.36, m<br><i>b</i> 1.47, m     | 22.7, CH <sub>2</sub>      |                                          |                            |
| 42  | 0.91, t (7.5)                            | 12.6, CH <sub>3</sub>      | 0.91, t (7.5)                            | 12.6, CH <sub>3</sub>      |                                          |                            |

<sup>a</sup>Measured in methanol-*d*<sub>4</sub>

**Table S3.** The antiSMASH-predicted BGCs for *Streptomyces* sp. SCSIO ZS0520 (the isolated compounds were marked by asterisks).

| BGC        | Position  |           | Type                                         | Product                            |
|------------|-----------|-----------|----------------------------------------------|------------------------------------|
|            | From      | To        |                                              |                                    |
| Cluster 1  | 17,846    | 63,286    | NRPS                                         |                                    |
| Cluster 2  | 103,824   | 113,669   | butyrolactone                                |                                    |
| Cluster 3  | 113,958   | 230,585   | Type I PKS                                   | salinomycin*                       |
| Cluster 4  | 548,354   | 569,586   | amglyccycl                                   |                                    |
| Cluster 5  | 645,592   | 808,502   | Type I PKS, NRPS-like, PKS-like              |                                    |
| Cluster 6  | 853,021   | 884,112   | terpene, RiPP-like                           |                                    |
| Cluster 7  | 928,480   | 991,057   | Lanthipeptide, NRPS                          |                                    |
| Cluster 8  | 1,010,302 | 1,111,960 | Type I PKS, NRPS-like                        |                                    |
| Cluster 9  | 1,115,560 | 1,150,300 | Thiopeptide                                  |                                    |
| Cluster 10 | 1,248,858 | 1,339,358 | Type I PKS, terpene                          | actinopyrone*                      |
| Cluster 11 | 1,354,638 | 1,439,438 | terpene, NRPS, lanthipeptide                 |                                    |
| Cluster 12 | 1,556,179 | 1,567,289 | siderophore                                  |                                    |
| Cluster 13 | 2,150,642 | 2,190,410 | others                                       |                                    |
| Cluster 14 | 2,280,379 | 2,299,470 | terpene                                      | albaflavenone                      |
| Cluster 15 | 2,419,735 | 2,483,685 | Type I PKS                                   |                                    |
| Cluster 16 | 2,513,091 | 2,535,635 | lassopeptide                                 | albusnodin                         |
| Cluster 17 | 3,106,467 | 3,114,851 | butyrolactone                                |                                    |
| Cluster 18 | 3,501,150 | 3,509,995 | melanin                                      | melanin                            |
| Cluster 19 | 3,624,813 | 3,671,426 | Type I PKS                                   |                                    |
| Cluster 20 | 3,730,653 | 3,826,257 | arylpolyene, NRPS-like, NRPS                 |                                    |
| Cluster 21 | 4,311,222 | 4,353,560 | NRPS-like, betalactone                       |                                    |
| Cluster 22 | 4,401,222 | 4,422,674 | lanthipeptide                                |                                    |
| Cluster 23 | 4,798,159 | 4,833,944 | non-alpha poly-amino acids                   |                                    |
| Cluster 24 | 5,142,276 | 5,183,295 | PKS-like, butyrolactone                      |                                    |
| Cluster 25 | 5,346,951 | 5,369,557 | lanthipeptide                                | SAL-2242                           |
| Cluster 26 | 5,409,264 | 5,477,405 | NRPS-like, arylpolyene, other                |                                    |
| Cluster 27 | 5,589,266 | 5,694,891 | hglE-KS, NRPS-like, Type II PKS, betalactone |                                    |
| Cluster 28 | 6,136,116 | 6,179,921 | Type I PKS                                   |                                    |
| Cluster 29 | 6,263,525 | 6,274,430 | RiPP-like                                    |                                    |
| Cluster 30 | 6,274,677 | 6,319,284 | ladderane, melanin                           | melanin                            |
| Cluster 31 | 6,655,575 | 6,665,973 | ectoine                                      | ectoine                            |
| Cluster 32 | 7,514,085 | 7,540,764 | terpene                                      | N-acetyl-aminobacteriohopanetriol* |
| Cluster 33 | 7,695,695 | 7,709,539 | siderophore                                  |                                    |
| Cluster 34 | 7,743,446 | 7,904,045 | Type I PKS, phenazine, NRPS                  | elaiophylin*                       |

**Table S4.** Deduced functions of *orfs* in the *sln* BGC.

| <i>orfs</i> | Size | Proposed function                             | ID/SI   | Protein homologue and origin                  |
|-------------|------|-----------------------------------------------|---------|-----------------------------------------------|
| 1           | 572  | 3-hydroxybutyryl-CoA dehydrogenase            | 100/100 | (AEZ53943.1): <i>Streptomyces albus</i> XM211 |
| 2           | 286  | 3-oxoacyl-(acyl-carrier-protein) synthase III | 99/100  | (AEZ53944.1): <i>Streptomyces albus</i> XM211 |
| A1          | 4897 | polyketide synthase                           | 99/99   | (AEZ53945.1): <i>Streptomyces albus</i> XM211 |
| A2          | 3917 | polyketide synthase                           | 99/99   | (AEZ53946.1): <i>Streptomyces albus</i> XM211 |
| A3          | 2698 | polyketide synthase                           | 99/99   | (AEZ53947.1): <i>Streptomyces albus</i> XM211 |
| A4          | 1645 | polyketide synthase                           | 99/99   | (AEZ53948.1): <i>Streptomyces albus</i> XM211 |
| A5          | 3750 | polyketide synthase                           | 99/99   | (AEZ53949.1): <i>Streptomyces albus</i> XM211 |
| A6          | 1435 | polyketide synthase                           | 99/99   | (AEZ53950.1): <i>Streptomyces albus</i> XM211 |
| A7          | 1644 | polyketide synthase                           | 99/99   | (AEZ53951.1): <i>Streptomyces albus</i> XM211 |
| A8          | 3724 | polyketide synthase                           | 99/99   | (AEZ53952.1): <i>Streptomyces albus</i> XM211 |
| A9          | 2312 | polyketide synthase                           | 99/100  | (AEZ53953.1): <i>Streptomyces albus</i> XM211 |
| B1          | 128  | epoxide hydrolase                             | 100/100 | (AEZ53954.1): <i>Streptomyces albus</i> XM211 |
| D1          | 265  | thioesterase                                  | 99/99   | (AEZ53955.1): <i>Streptomyces albus</i> XM211 |
| M           | 271  | O-methyltransferase-like protein              | 99/99   | (AEZ53956.1): <i>Streptomyces albus</i> XM211 |
| E           | 93   | ferredoxin protein                            | 98/98   | (AEZ53957.1): <i>Streptomyces albus</i> XM211 |
| F           | 393  | cytochrome P450                               | 100/100 | (AEZ53958.1): <i>Streptomyces albus</i> XM211 |
| TI          | 325  | ABC transporter ATP-binding protein           | 97/97   | (AEZ53959.1): <i>Streptomyces albus</i> XM211 |
| TII         | 546  | antibiotic ABC transporter efflux pump        | 99/99   | (AEZ53960.1): <i>Streptomyces albus</i> XM211 |
| BII         | 149  | epoxide hydrolase                             | 100/100 | (AEZ53961.1): <i>Streptomyces albus</i> XM211 |
| BIII        | 153  | epoxide hydrolase                             | 99/99   | (AEZ53962.1): <i>Streptomyces albus</i> XM211 |
| C           | 484  | epoxidase                                     | 99/99   | (AEZ53963.1): <i>Streptomyces albus</i> XM211 |
| R           | 907  | transcriptional regulator                     | 99/99   | (AEZ53964.1): <i>Streptomyces albus</i> XM211 |
| DII         | 239  | thioesterase                                  | 99/100  | (AEZ53965.1): <i>Streptomyces albus</i> XM211 |
| 3           | 597  | peptide synthetase                            | 99/100  | (AEZ53966.1): <i>Streptomyces albus</i> XM211 |
| 4           | 74   | hypothetical protein                          | 100/100 | (AJE80634.1): <i>Streptomyces albus</i>       |
| 5           | 73   | hypothetical protein                          | 100/100 | (AJE80633.1): <i>Streptomyces albus</i>       |
| 6           | 78   | hypothetical protein                          | 100/100 | (AEZ53967.1): <i>Streptomyces albus</i> XM211 |
| 7           | 855  | SARP family transcriptional regulator         | 99/98   | (AEZ53968.1): <i>Streptomyces albus</i> XM211 |
| 8           | 597  | AMP-binding domain-containing protein         | 99/99   | (AEZ53969.1): <i>Streptomyces albus</i> XM211 |
| 9           | 572  | acyl-CoA dehydrogenase                        | 97/97   | (AEZ53970.1): <i>Streptomyces albus</i> XM211 |
| 10          | 96   | peptide carrier protein                       | 100/100 | (AEZ53971.1): <i>Streptomyces albus</i> XM211 |

**Table S5.** Deduced functions of *orfs* in the *ela* BGC.

| <i>orfs</i> | Size | Proposed function                                      | ID/SI   | Protein homologue and origin                             |
|-------------|------|--------------------------------------------------------|---------|----------------------------------------------------------|
| <i>elaA</i> | 799  | LuxR family transcriptional regulator                  | 41/54   | (AKZ60150.1): <i>Streptomyces ambofaciens</i> ATCC 23877 |
| <i>elaB</i> | 486  | dTDP-4-keto-6-deoxy-hexose<br>2,3-dehydratase          | 45/61   | (AJO72724.1): <i>Nocardia brasiliensis</i> IFM-0406      |
| <i>elaC</i> | 328  | dTDP-4-keto-6-deoxy-hexose<br>2,3-reductase            | 69/79   | (AJO72719.1): <i>Nocardia brasiliensis</i> IFM-0406      |
| <i>elaD</i> | 341  | dTDP-4-keto-6-deoxy-hexose<br>4-ketoreductase          | 46/60   | (AJO72721.1): <i>Nocardia brasiliensis</i> IFM-0406      |
| <i>elaE</i> | 216  | LuxR family two component<br>transcriptional regulator | 99/99   | (AJE87692.1): <i>Streptomyces albus</i> DSM 41398        |
| <i>elaF</i> | 461  | sensor histidine kinase                                | 97/96   | (AJE87694.1): <i>Streptomyces albus</i> DSM 41398        |
| <i>elaG</i> | 245  | ABC transporter                                        | 100/100 | (AJE87693.1): <i>Streptomyces albus</i> DSM 41398        |
| <i>elaH</i> | 302  | ABC transporter                                        | 100/100 | (AJE87695.1): <i>Streptomyces albus</i> DSM 41398        |
| <i>elaI</i> | 209  | dTDP-4-keto-6-deoxy-hexose<br>3,5-epimerase            | 52/65   | (AJO72701.1): <i>Nocardia brasiliensis</i> IFM-0406      |
| <i>elaJ</i> | 417  | glycosyltransferase                                    | 38/57   | (AJO72738.1): <i>Nocardia brasiliensis</i> IFM-0406      |
| <i>elaK</i> | 261  | thioesterase                                           | 99/100  | (AJE87697.1): <i>Streptomyces albus</i> DSM 41398        |
| <i>elaL</i> | 2086 | polyketide synthase                                    | 99/99   | (AJE87699.1): <i>Streptomyces albus</i> DSM 41398        |
| <i>elaM</i> | 3411 | polyketide synthase                                    | 99/99   | (AJE87700.1): <i>Streptomyces albus</i> DSM 41398        |
| <i>elaN</i> | 1631 | polyketide synthase                                    | 99/99   | (AJE87701.1): <i>Streptomyces albus</i> DSM 41398        |
| <i>elaO</i> | 1622 | polyketide synthase                                    | 99/99   | (AJE87702.1): <i>Streptomyces albus</i> DSM 41398        |
| <i>elaP</i> | 4367 | polyketide synthase                                    | 99/99   | (AJE87703.1): <i>Streptomyces albus</i> DSM 41398        |
| <i>elaQ</i> | 320  | dTDP-glucose 4,6-dehydratase                           | 100/100 | (AJE87704.1): <i>Streptomyces albus</i> DSM 41398        |
| <i>elaR</i> | 274  | glucose-1-phosphate<br>thymidyltransferase             | 54/71   | (AJO72746.1): <i>Nocardia brasiliensis</i> IFM-0406      |
| <i>elaS</i> | 1127 | LuxR family transcriptional regulator                  | 93/94   | (AJE87706.1): <i>Streptomyces albus</i> DSM 41398        |

**Table S6.** Deduced functions of *orfs* in the *hpn* BGC.

| <i>orfs</i> | Size | Proposed function                | ID/SI | Protein homologue and origin                       |
|-------------|------|----------------------------------|-------|----------------------------------------------------|
| <i>hpnC</i> | 301  | hydroxysqualene synthase         | 31/45 | (CAA04732.1): <i>Zymomonas mobilis</i>             |
| <i>hpnD</i> | 312  | presqualene diphosphate synthase | 39/52 | (CAA04733.1): <i>Zymomonas mobilis</i>             |
| <i>hpnE</i> | 478  | squalene/phytoene dehydrogenase  | 28/41 | (CAA04734.1): <i>Zymomonas mobilis</i>             |
| <i>hpnB</i> | 342  | polyprenyl synthase              | 56/67 | (ADO85577.1): <i>Streptomyces arenae</i>           |
| <i>hpnF</i> | 657  | squalene-hopene cyclase          | 41/58 | (CAA04735.1): <i>Zymomonas mobilis</i>             |
| <i>hpnG</i> | 217  | nucleoside phosphorylases        | 73/81 | (CAB39698.1): <i>Streptomyces coelicolor</i> A3(2) |
| <i>hpnH</i> | 337  | radical SAM enzyme               | 92/97 | (CAB39699.1): <i>Streptomyces coelicolor</i> A3(2) |
| <i>hpnO</i> | 461  | aminotransferase                 | 87/92 | (CAB39702.1): <i>Streptomyces coelicolor</i> A3(2) |

**Figure S1.** The Selected HMBC and  $^1\text{H}$ - $^1\text{H}$  COSY of new compounds isolated from *Streptomyces* sp. SCSIO ZS0520.

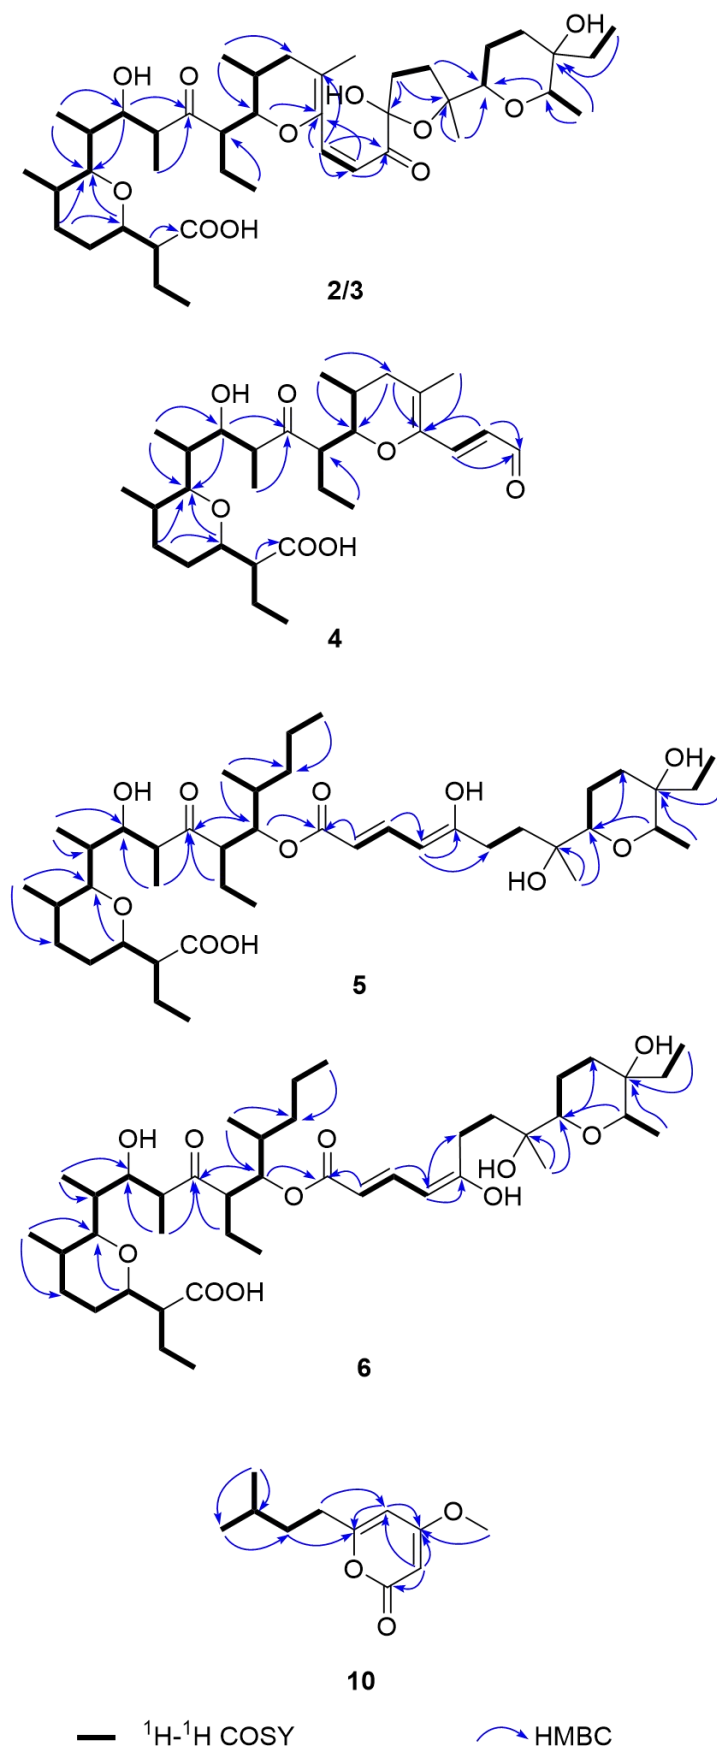

**Figure S2.** The taxonomic classification of ZS0520 genome inferred by the Microbial Genomes Atlas (MiGA) found against all the genomes in the database.

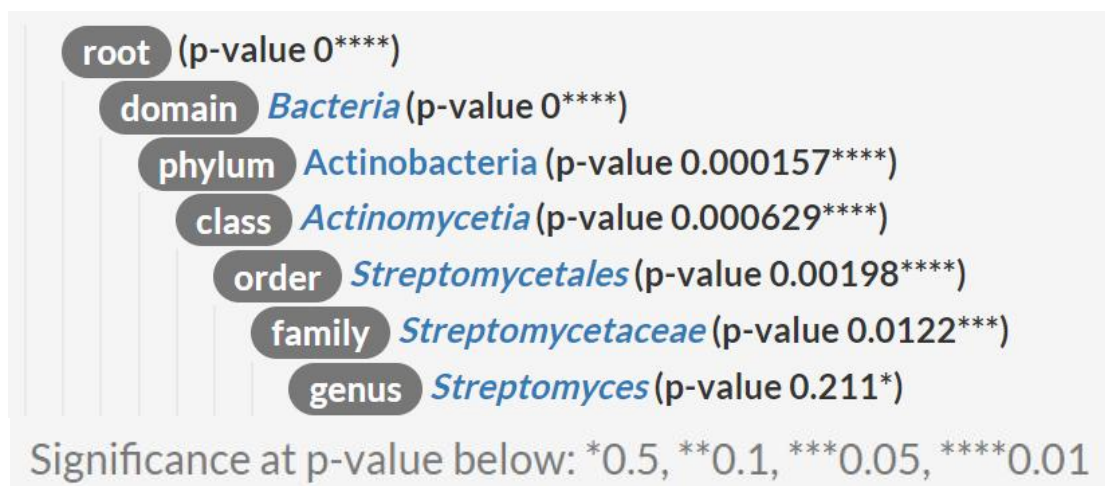

**Figure S3.** The potential degradation mechanisms of salinomycin.

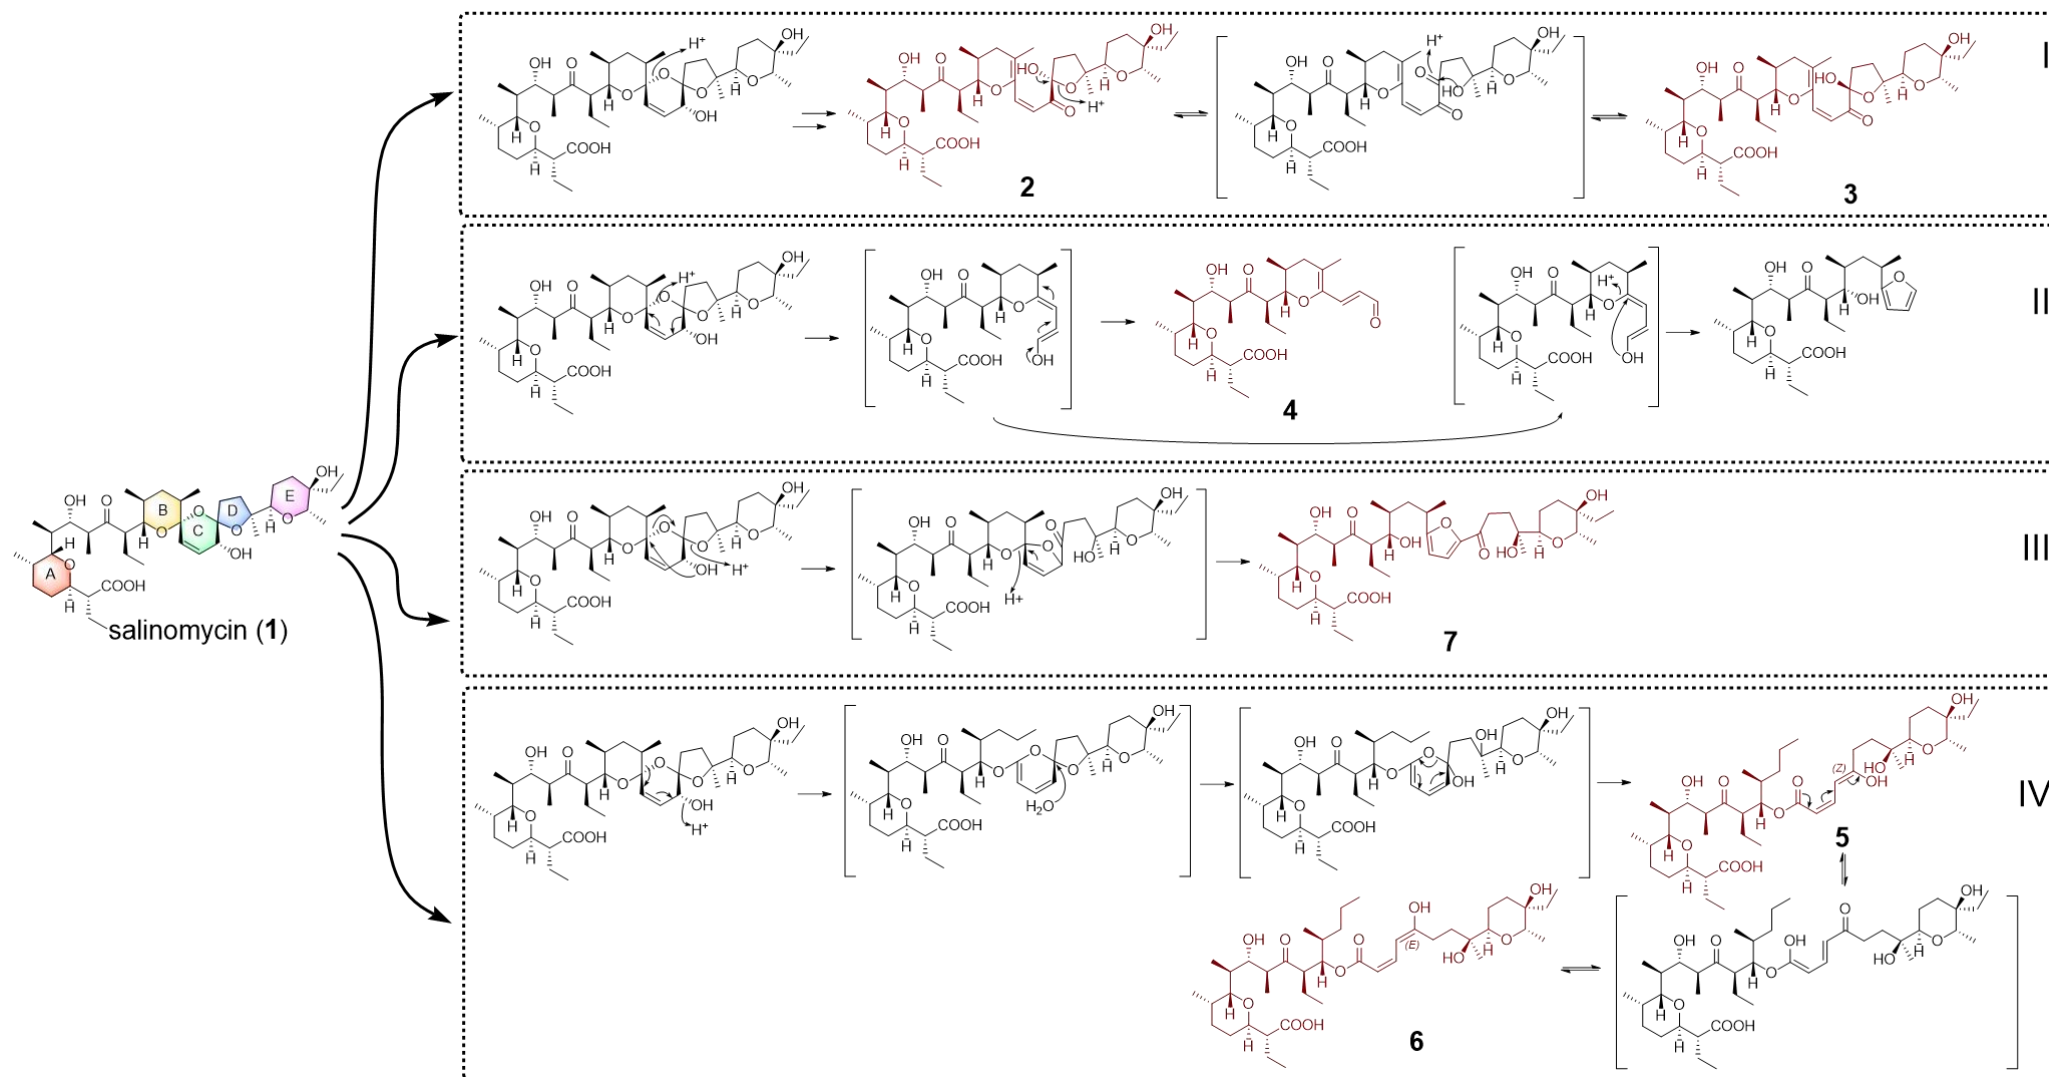



**Figure S4.** HRESIMS spectrum of *seco*-salinomycin A and B (2 and 3).

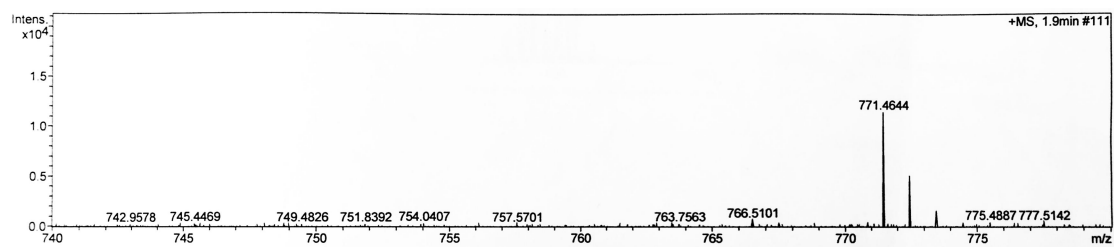

**Figure S5.**  $^1\text{H}$  NMR (700 MHz,  $\text{DMSO-}d_6$ ) spectrum of *seco*-salinomycin A and B (2 and 3).

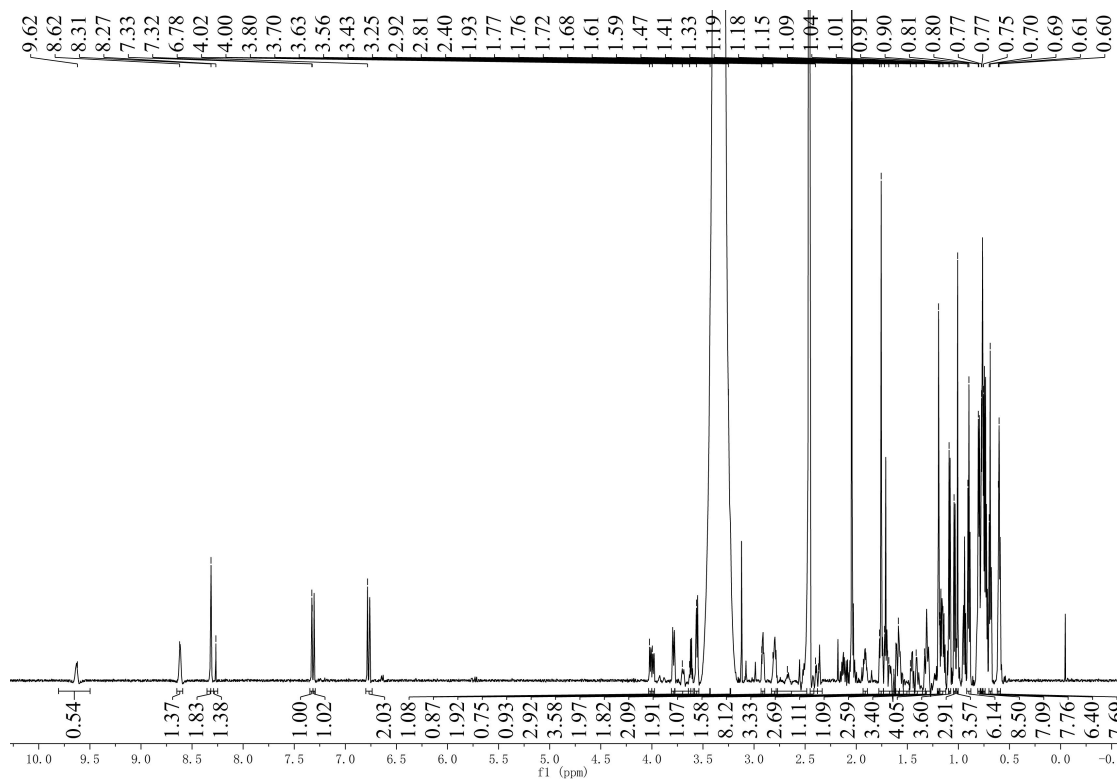

**Figure S6.**  $^{13}\text{C}$  NMR (175 MHz,  $\text{DMSO}-d_6$ ) spectrum of *seco*-salinomycin A and B (2 and 3).

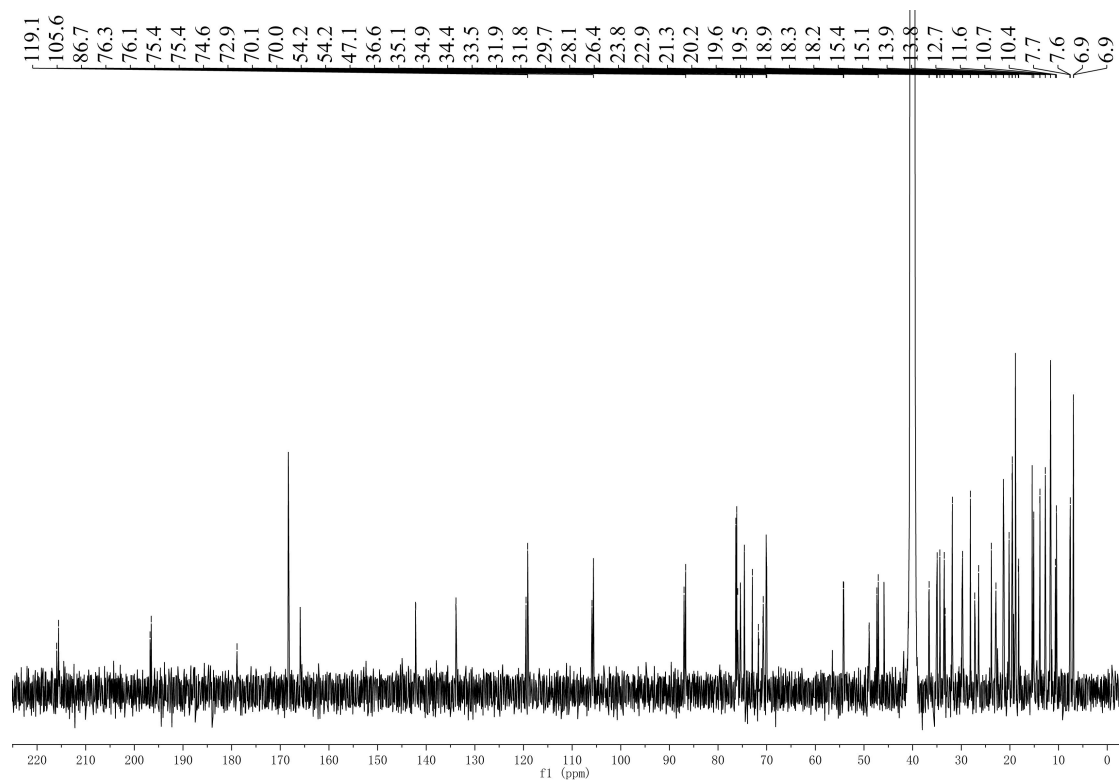

**Figure S7.**  $^{13}\text{C}$ -DEPT (150 MHz,  $\text{DMSO}-d_6$ ) spectrum of *seco*-salinomycin A and B (2 and 3).

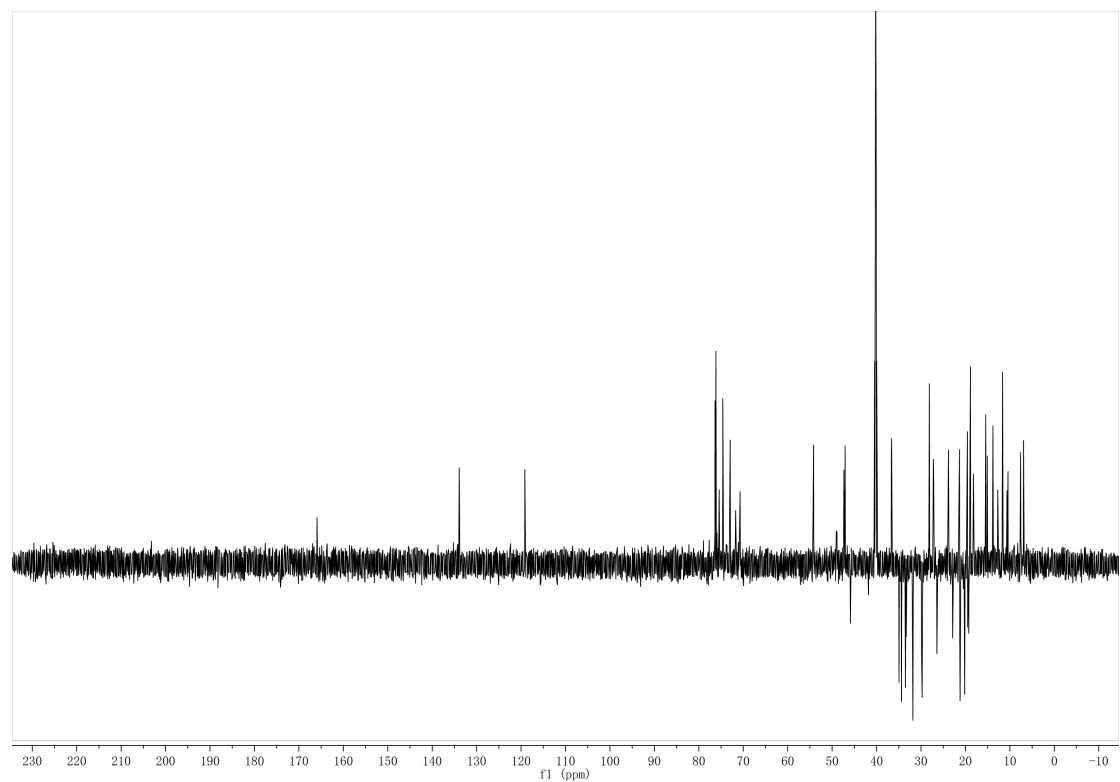

**Figure S8.**  $^1\text{H}$ - $^1\text{H}$  COSY spectrum of *seco*-salinomycin A and B (**2** and **3**).

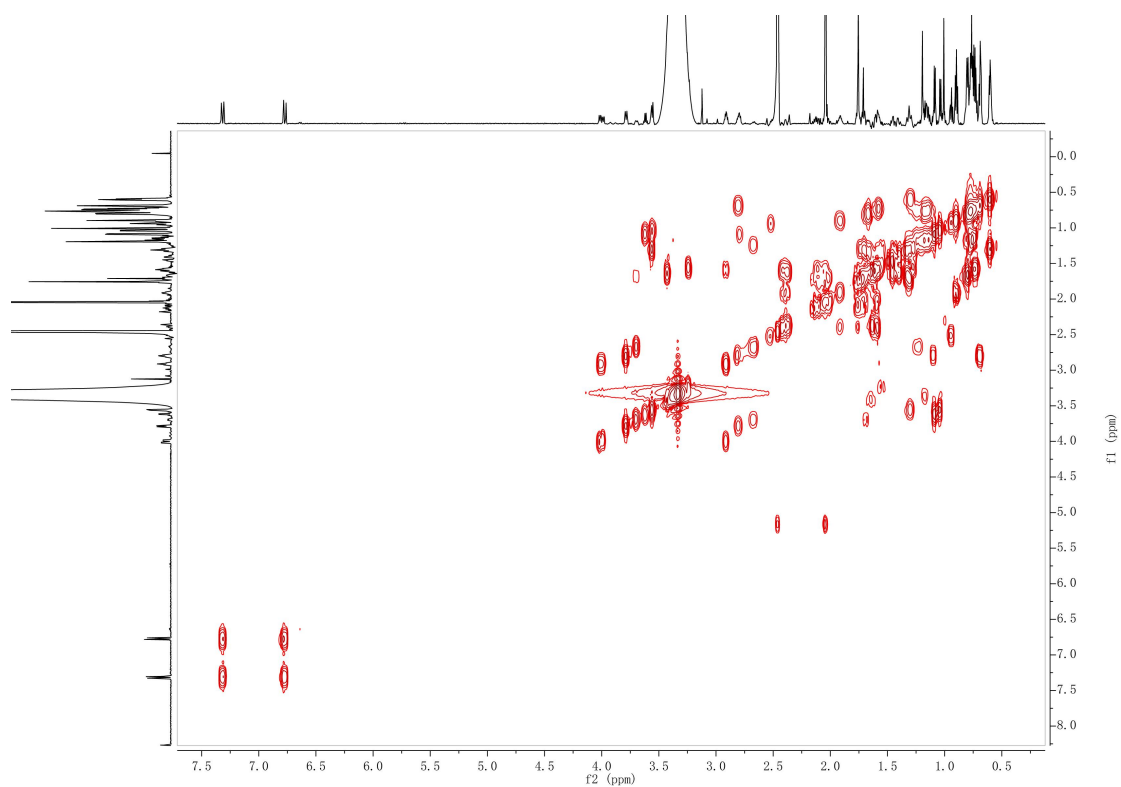

**Figure S9.** HSQC spectrum of *seco*-salinomycin A and B (**2** and **3**).

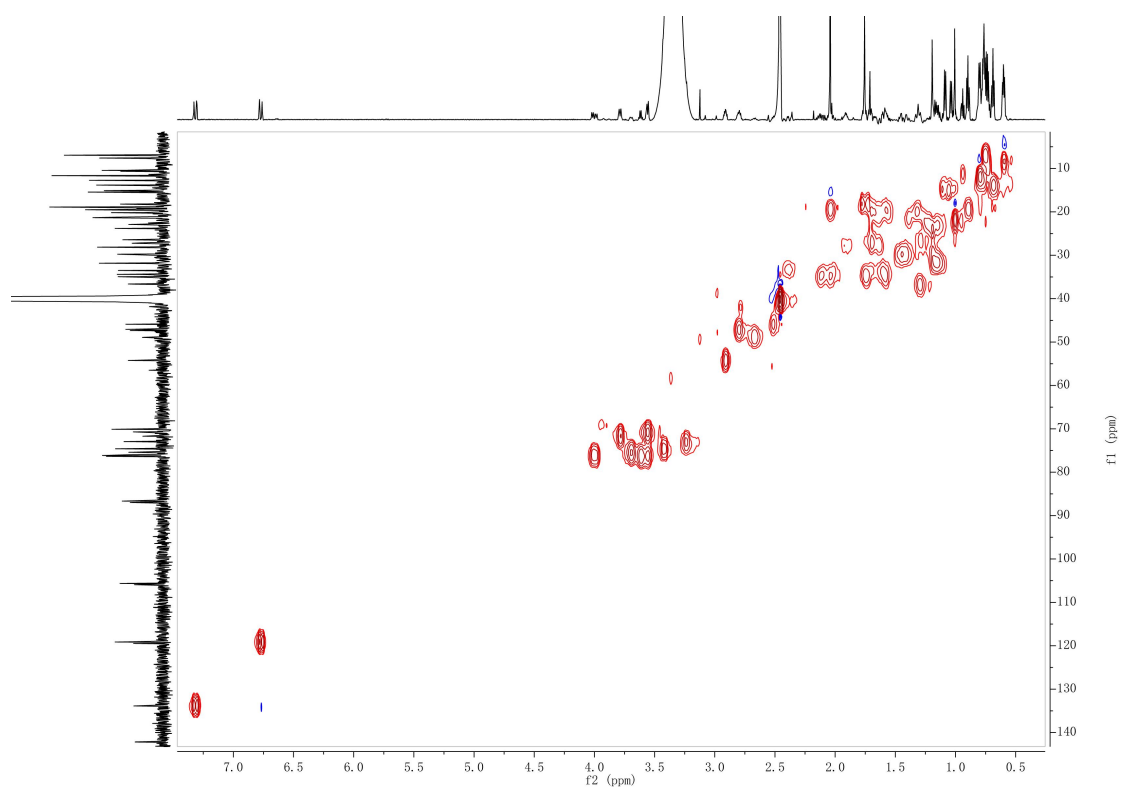

**Figure S10.** HMBC spectrum of *seco*-salinomycin A and B (2 and 3).

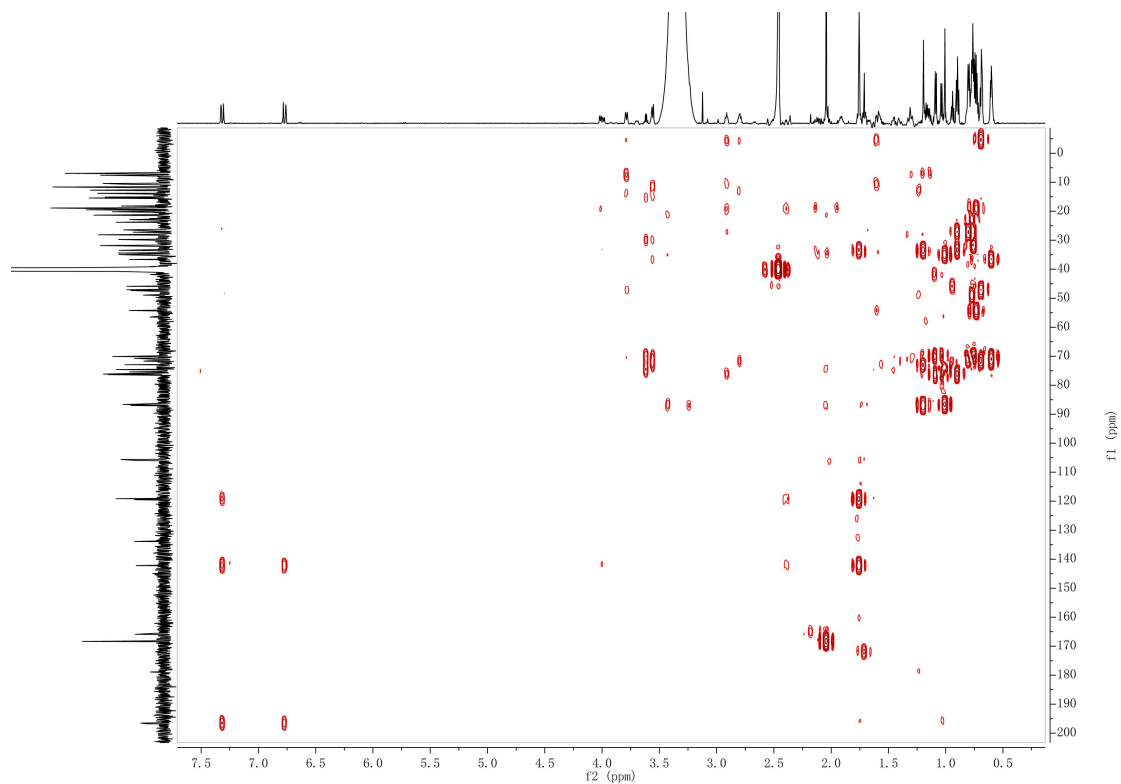

**Figure S11.** NOESY spectrum of *seco*-salinomycin A and B (2 and 3).

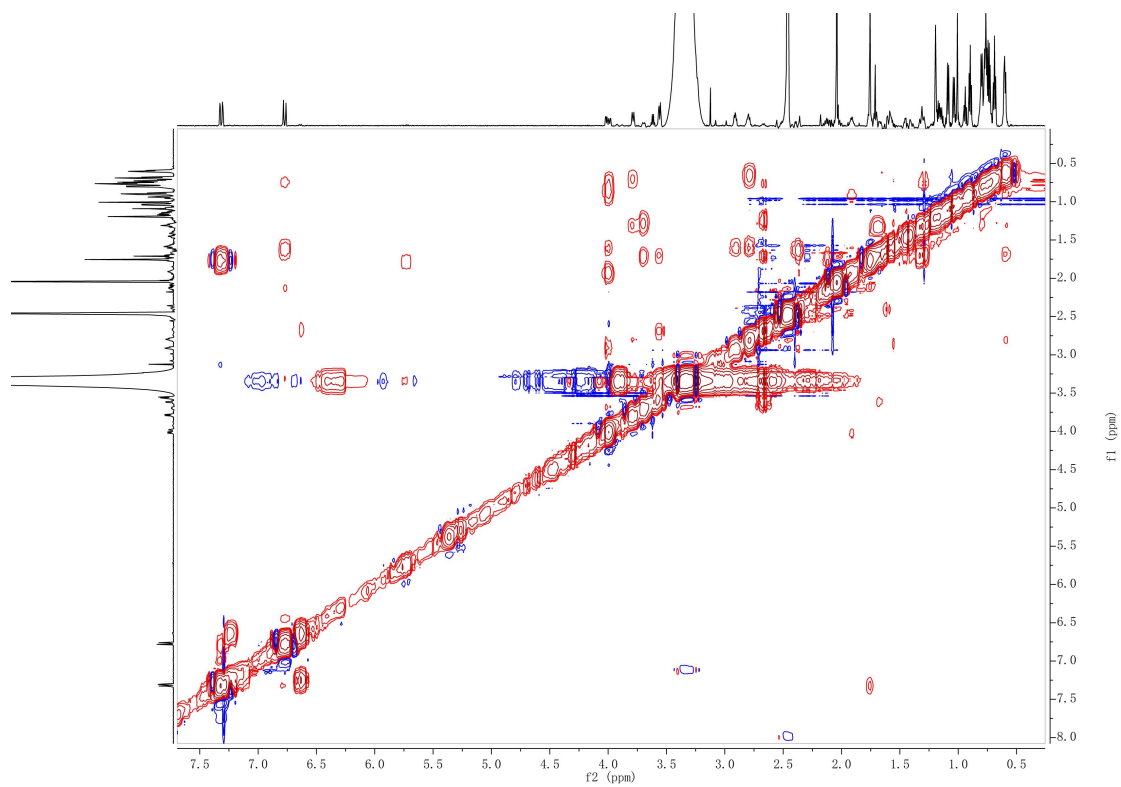

**Figure S12.** HRESIMS spectrum of *seco*-salinomycin C (**4**).

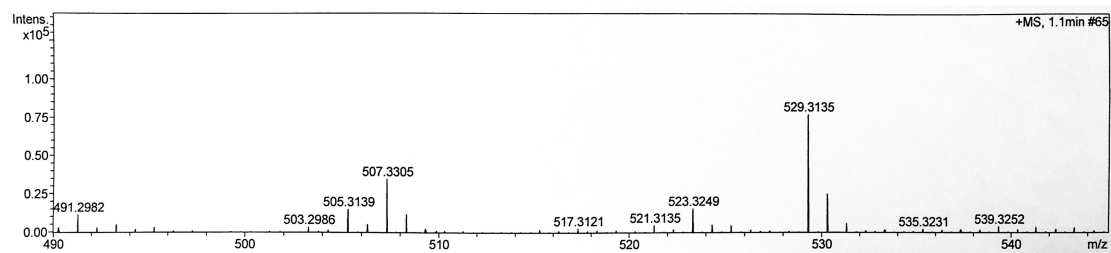

**Figure S13.**  $^1\text{H}$  NMR (700 MHz,  $\text{CDCl}_3$ ) spectrum of *seco*-salinomycin C (**4**).

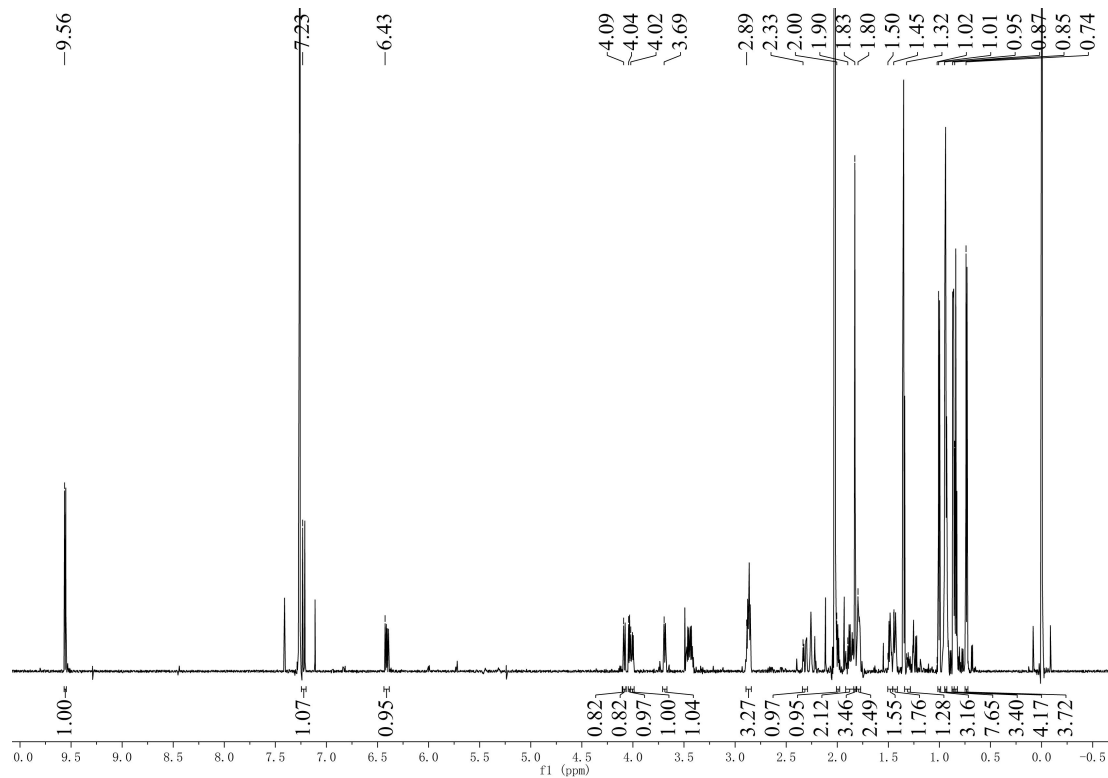

**Figure S14.**  $^{13}\text{C}$  NMR (175 MHz,  $\text{CDCl}_3$ ) spectrum of *seco*-salinomycin C (**4**).

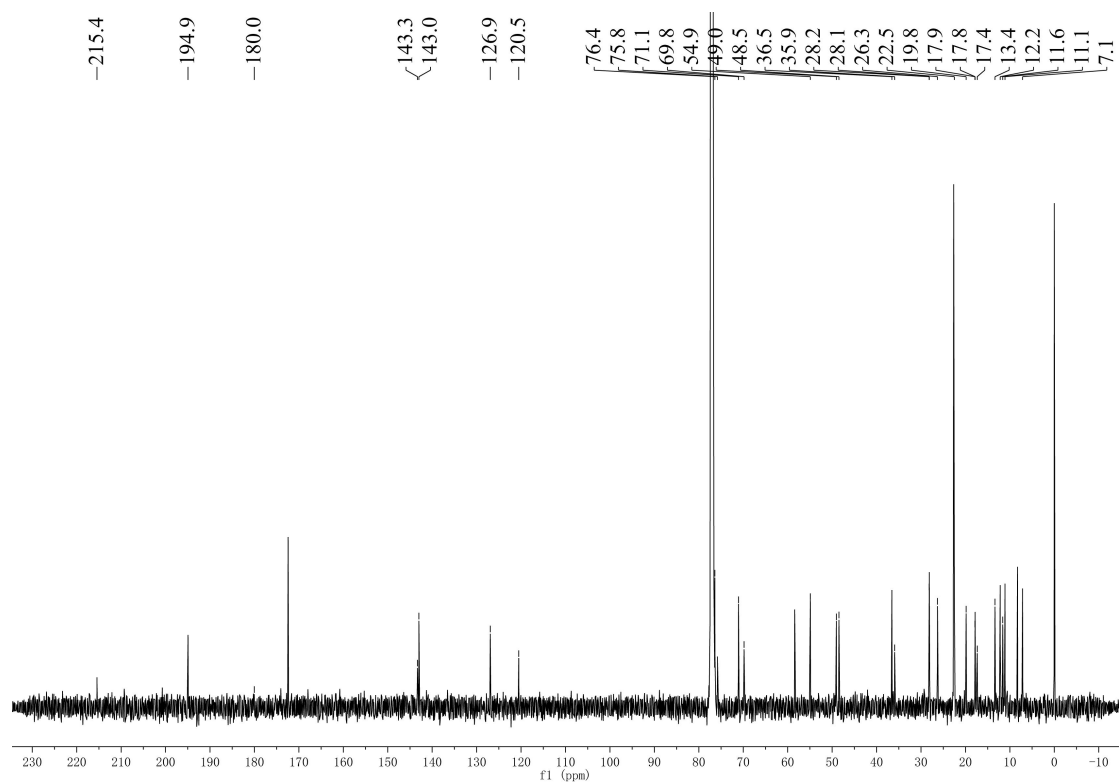

**Figure S15.**  $^{13}\text{C}$ -DEPT (175 MHz,  $\text{CDCl}_3$ ) spectrum of *seco*-salinomycin C (**4**).

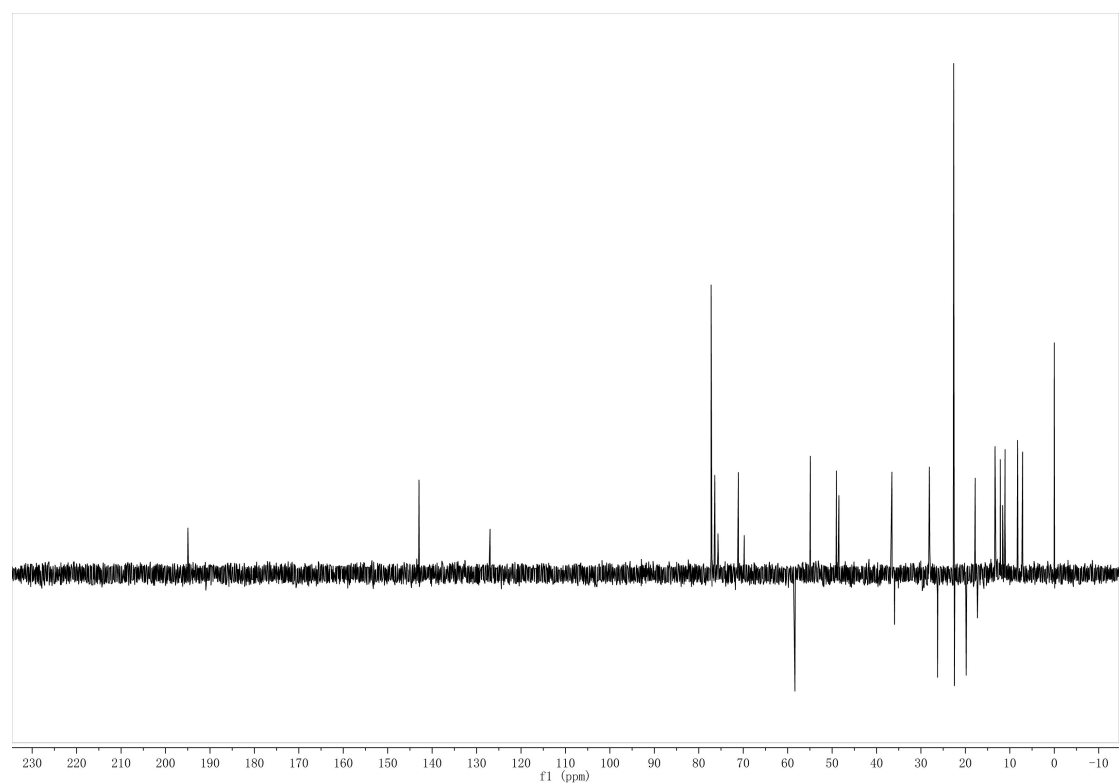

**Figure S16.**  $^1\text{H}$ - $^1\text{H}$  COSY spectrum of *seco*-salinomycin C (**4**).

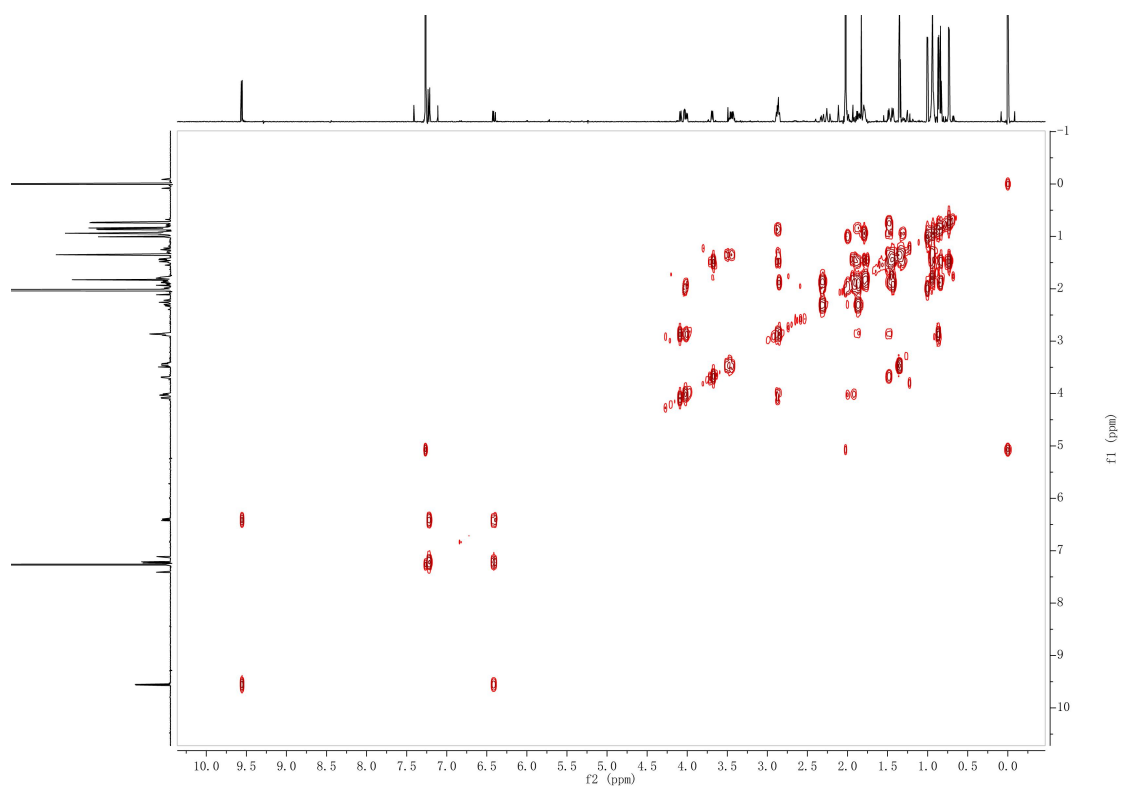

**Figure S17.** HSQC spectrum of *seco*-salinomycin C (**4**).

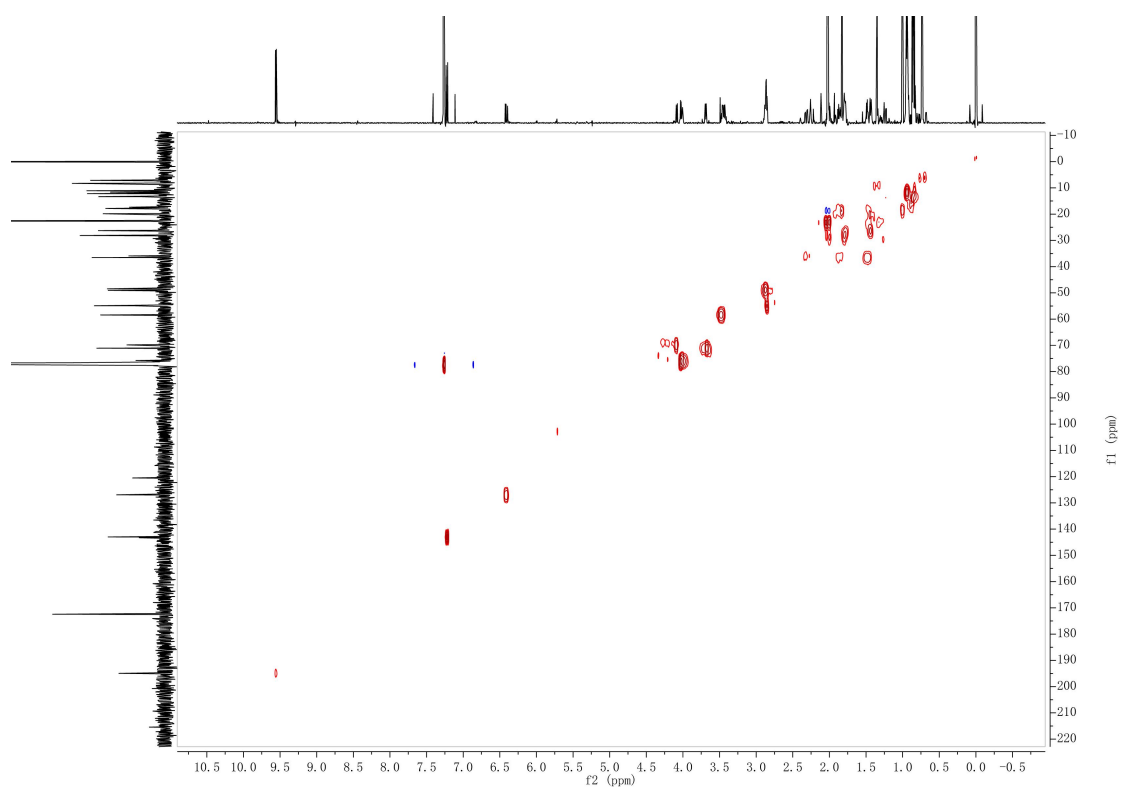

**Figure S18.** HMBC spectrum of *seco*-salinomycin C (**4**).

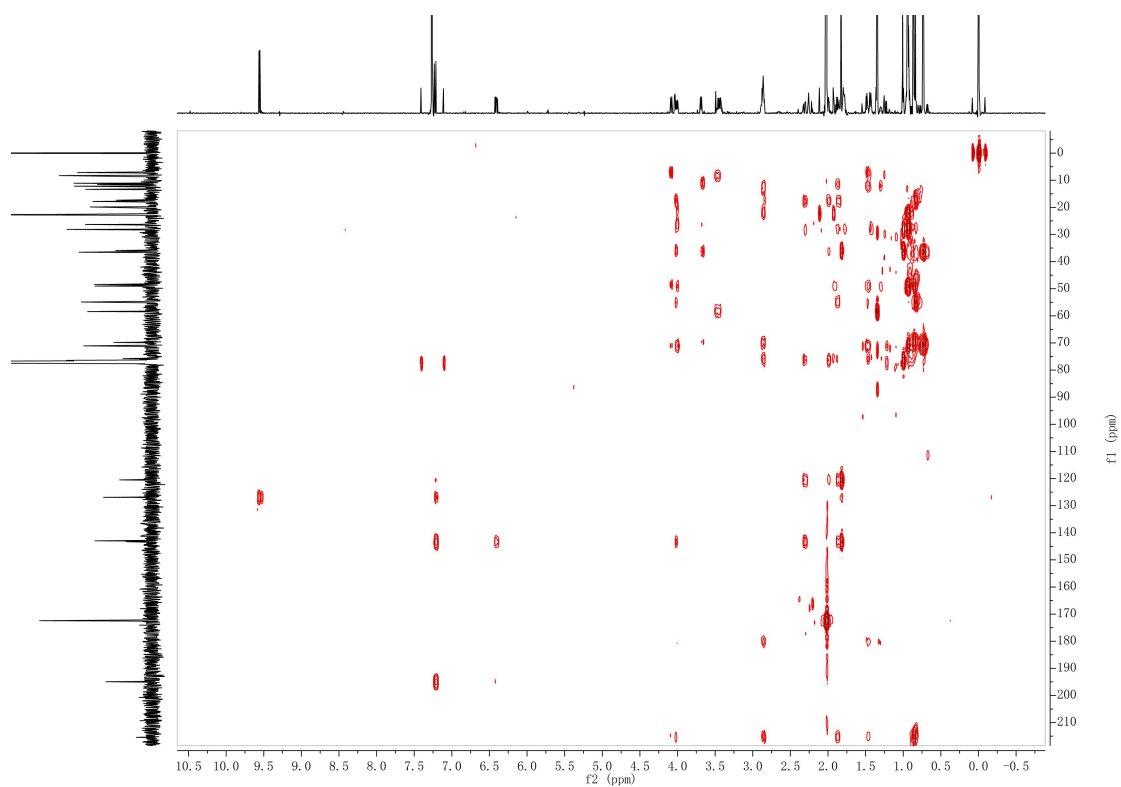

**Figure S19.** NOESY spectrum of *seco*-salinomycin C (**4**).

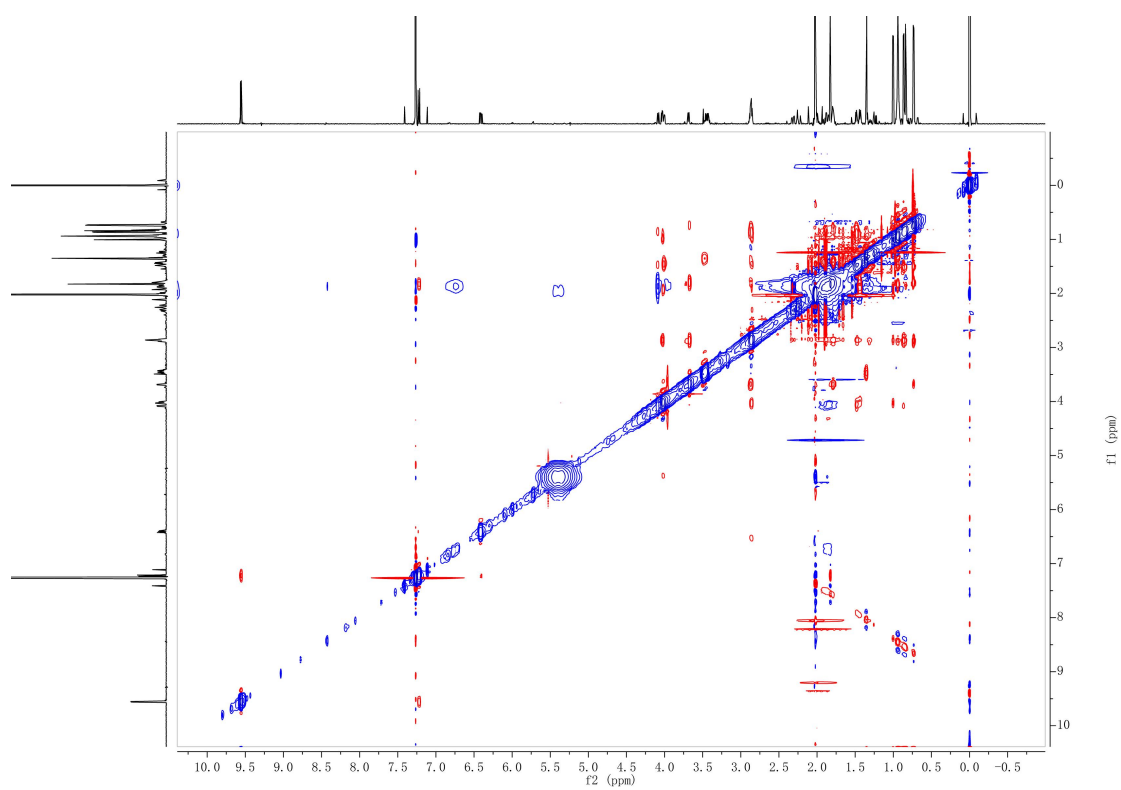



**Figure S20.** HRESIMS spectrum of *seco*-salinomycin D and E (**5** and **6**).

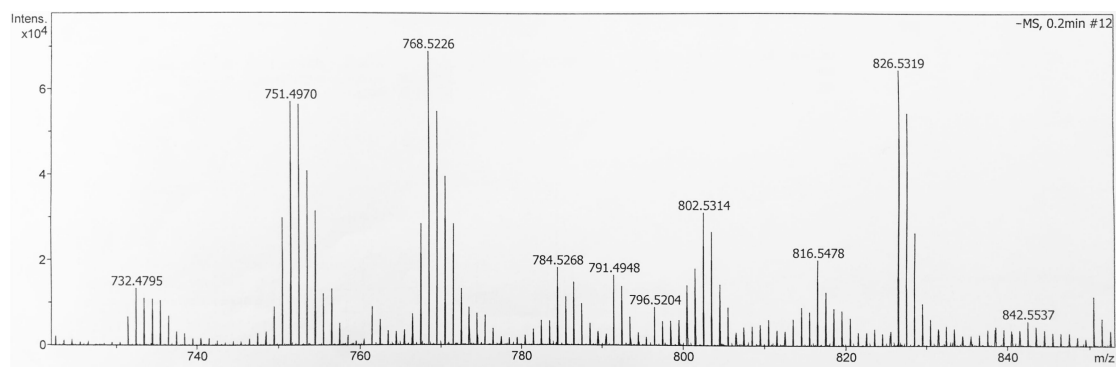

**Figure S21.**  $^1\text{H}$  NMR (700 MHz, methanol- $d_4$ ) spectrum of *seco*-salinomycin D and E (**5** and **6**).

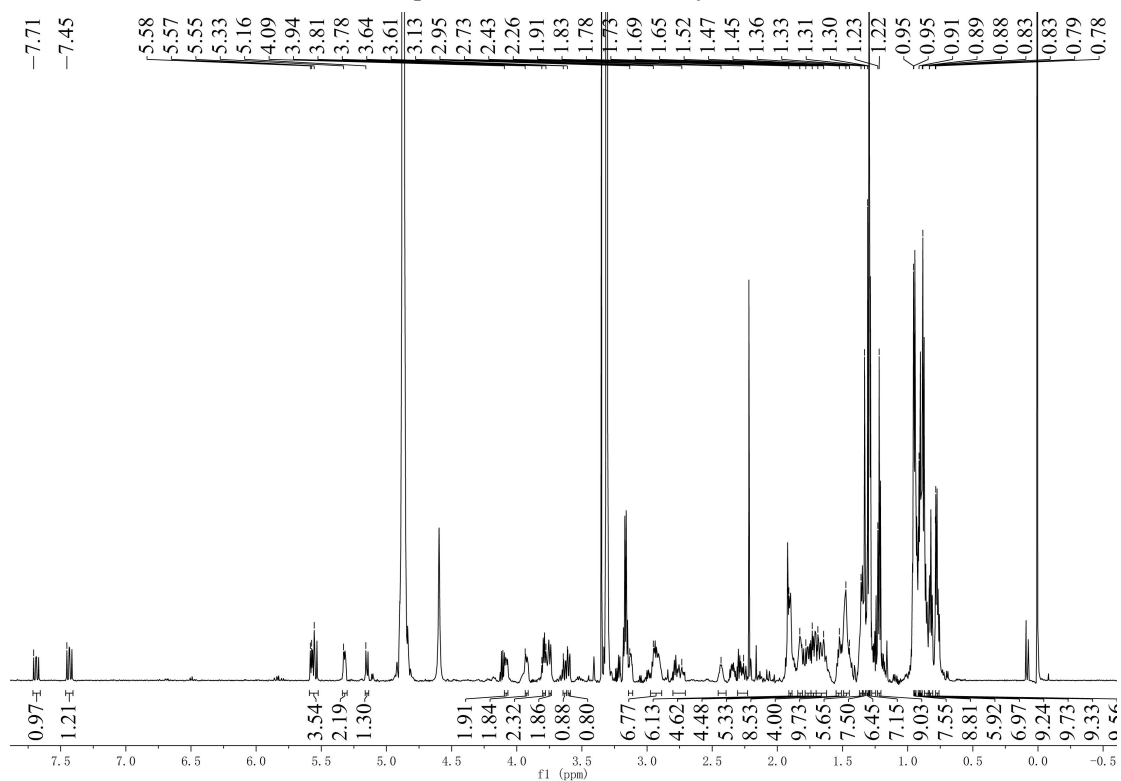

**Figure S22.**  $^{13}\text{C}$  NMR (175 MHz, methanol- $d_4$ ) spectrum of *seco*-salinomycin D and E (5 and 6).

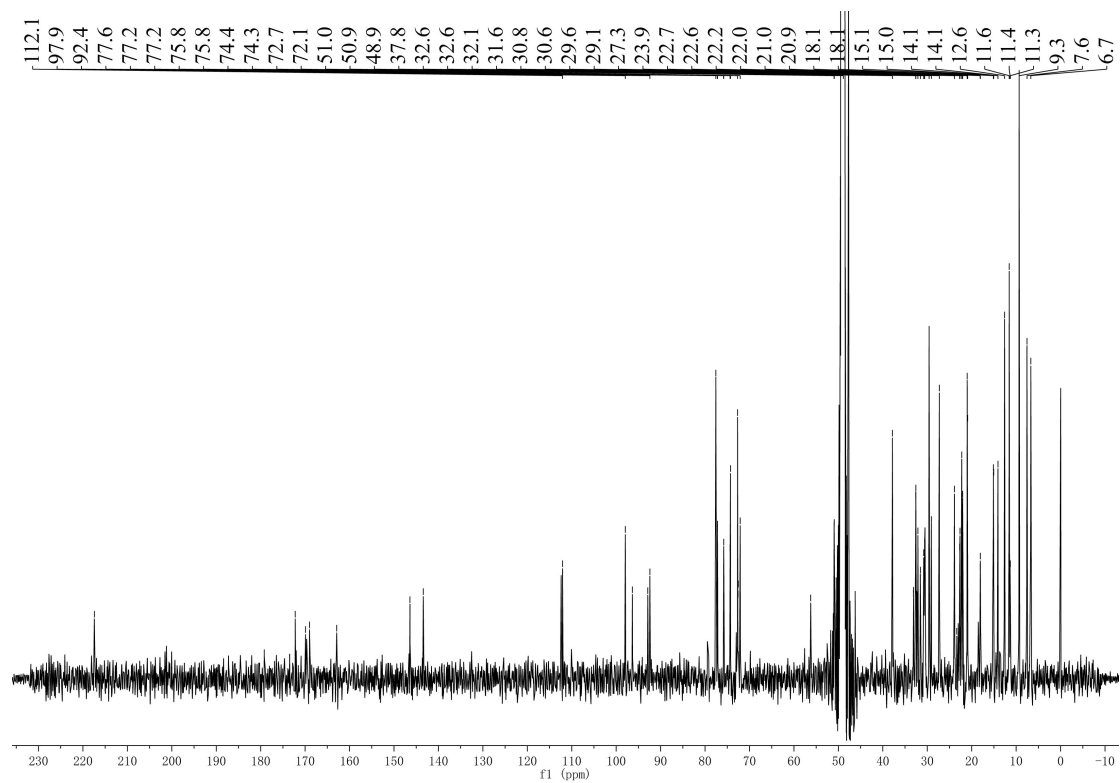

**Figure S23.**  $^{13}\text{C}$ -DEPT (175 MHz, methanol- $d_4$ ) spectrum of *seco*-salinomycin D and E (5 and 6).

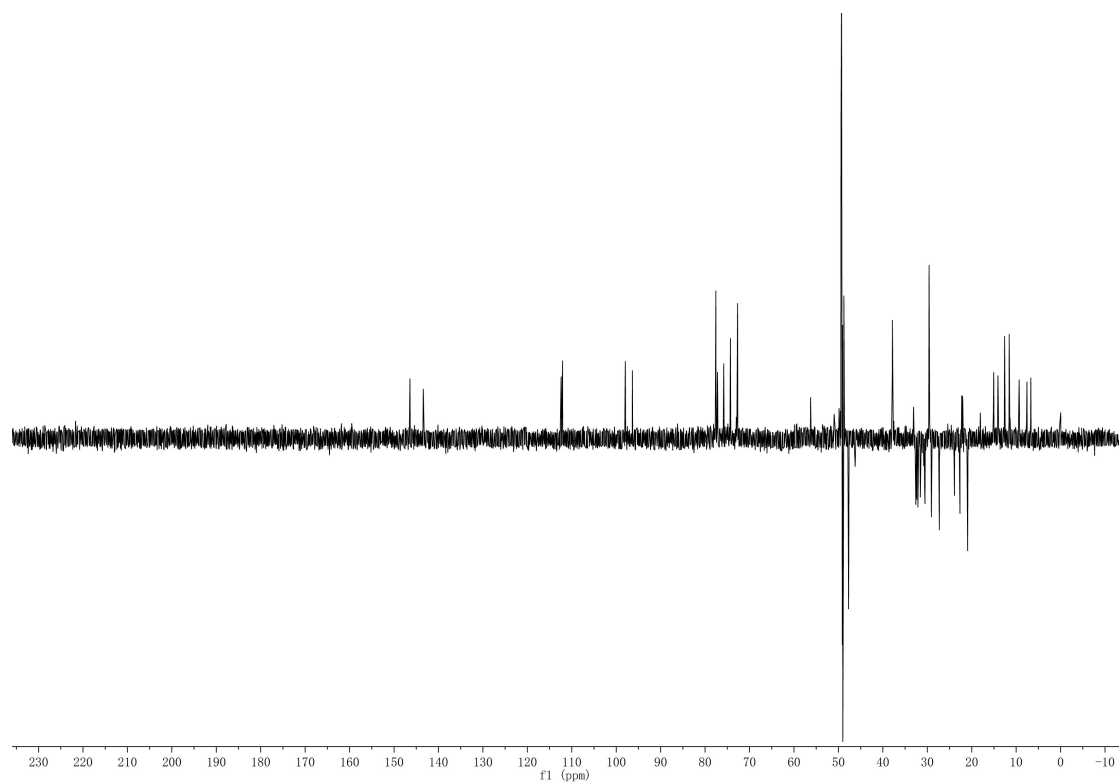

**Figure S24.**  $^1\text{H}$ - $^1\text{H}$  COSY spectrum of *seco*-salinomycin D and E (5 and 6).

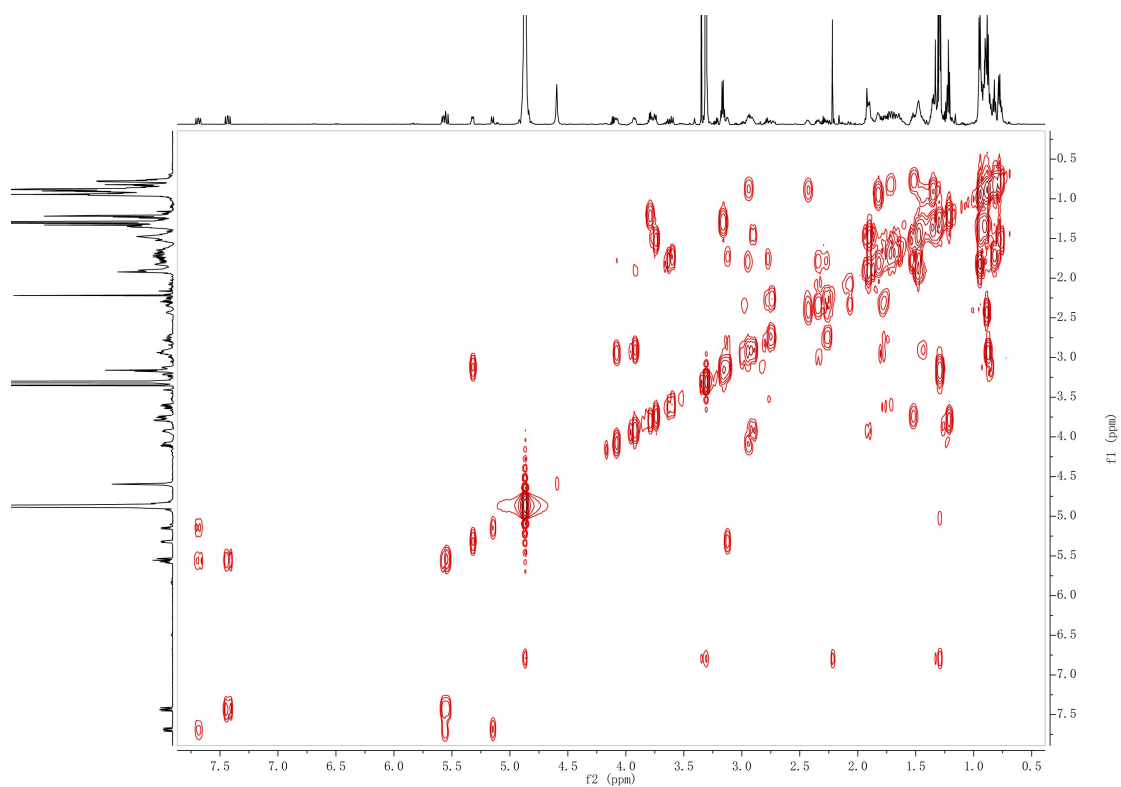

**Figure S25.** HSQC spectrum of *seco*-salinomycin D and E (5 and 6).

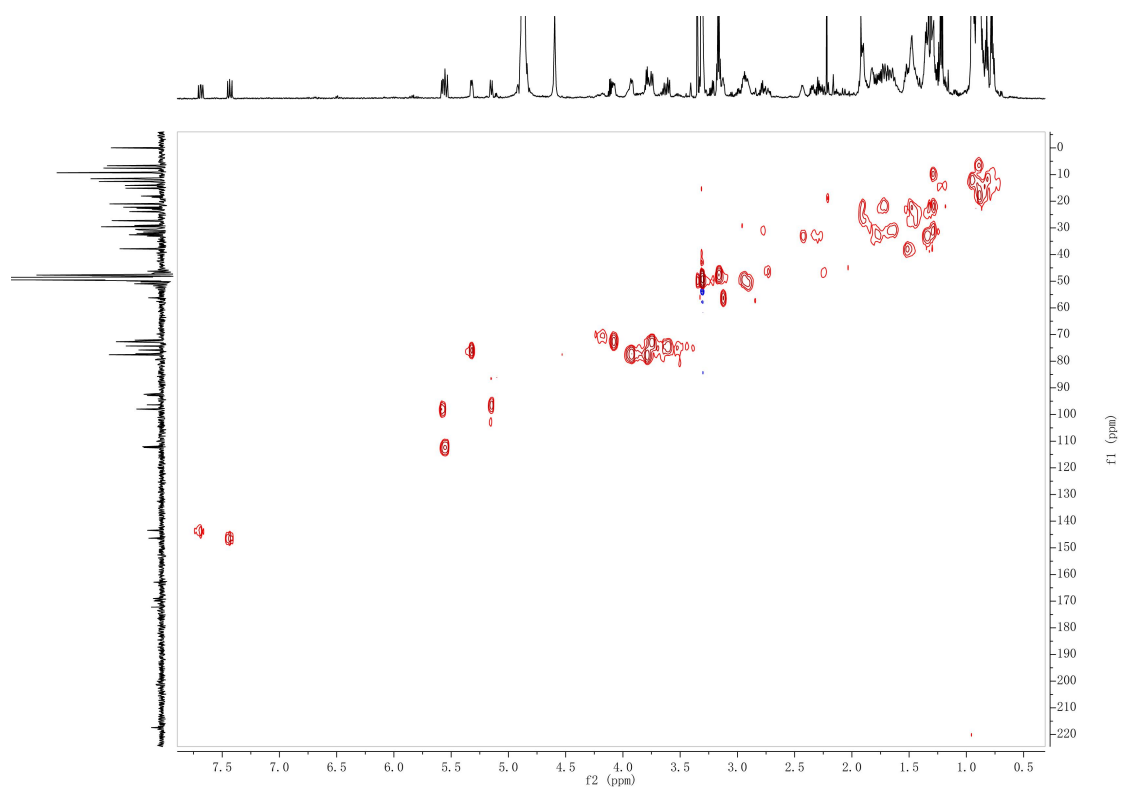

Figure S26. HMBC spectrum of *seco*-salinomycin D and E (5 and 6).

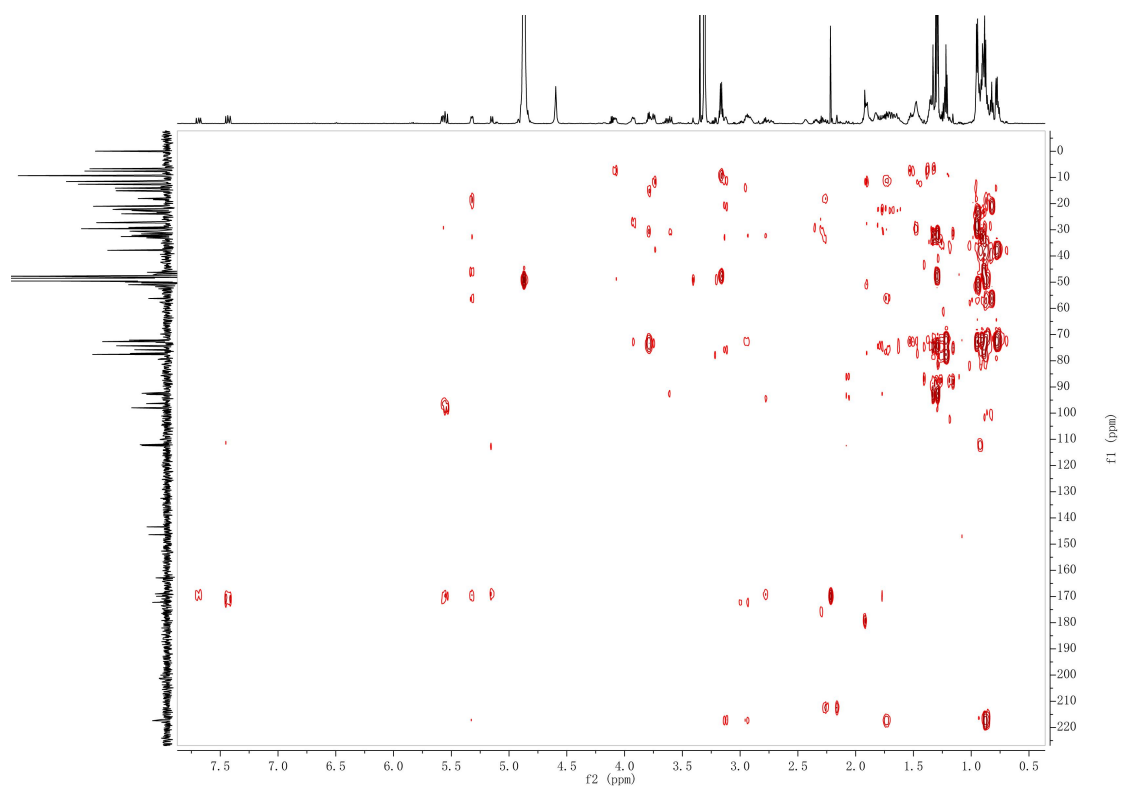

Figure S27. NOESY spectrum of *seco*-salinomycin D and E (5 and 6).

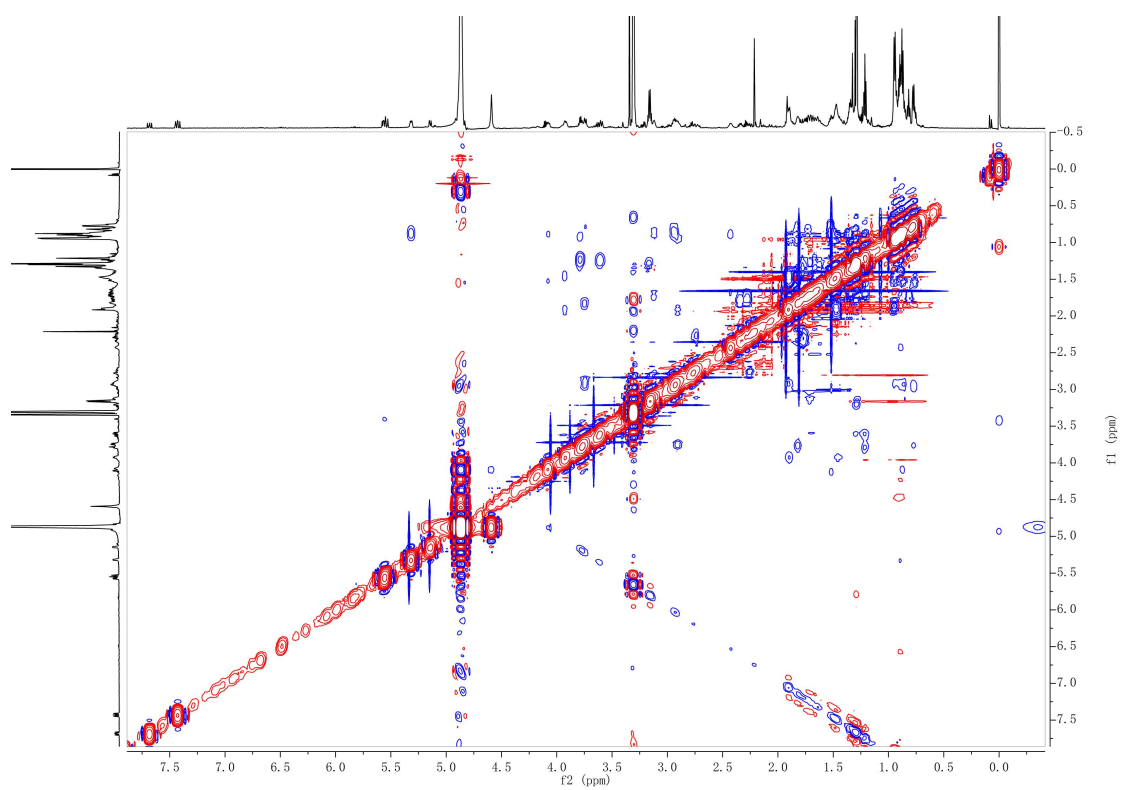

**Figure S28.** HRESIMS spectrum of minipyronone (**10**).

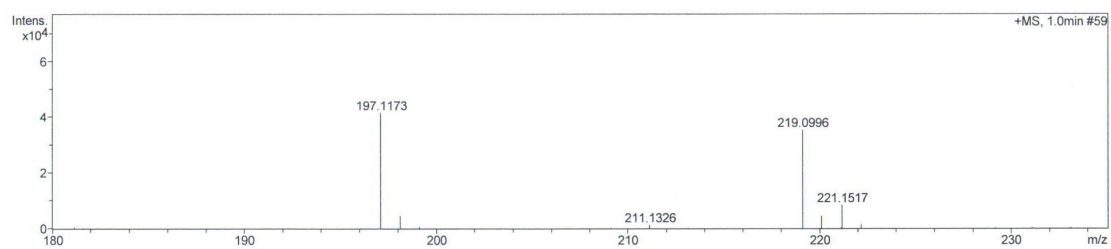

**Figure S29.**  $^1\text{H}$  NMR (700 MHz, methanol- $d_4$ ) spectrum of minipyronone (**10**).

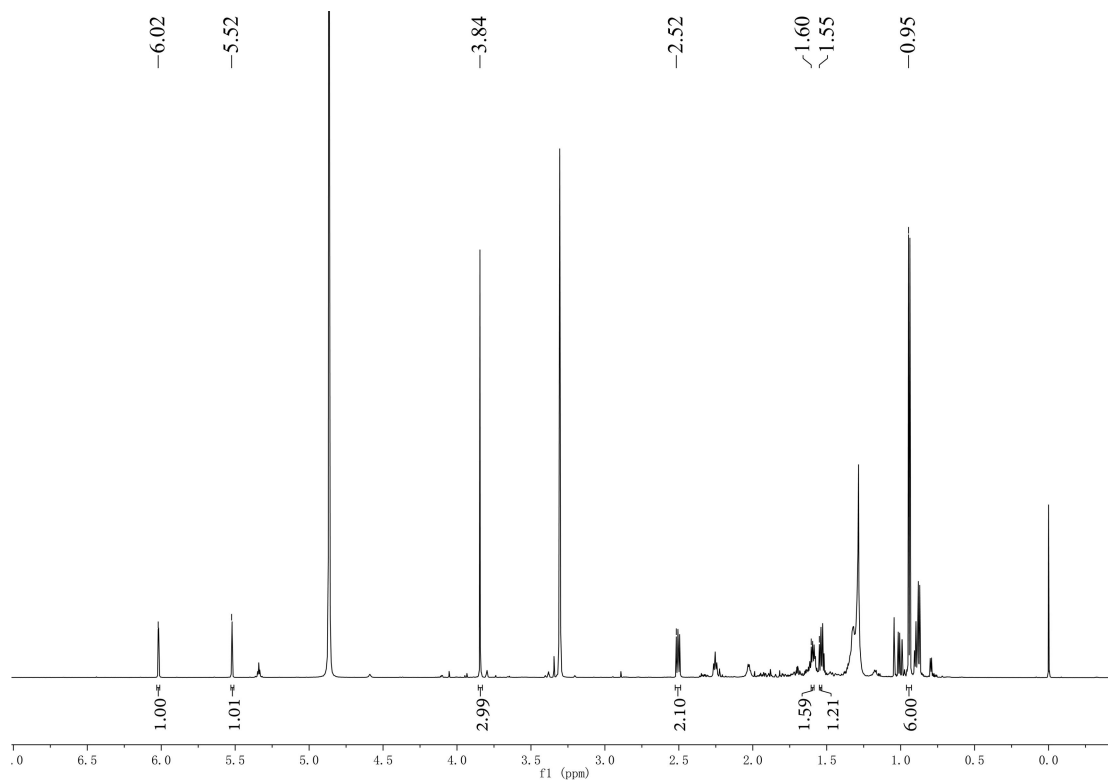

**Figure S30.**  $^{13}\text{C}$  NMR (175MHz, methanol- $d_4$ ) spectrum of minipyrone (**10**).

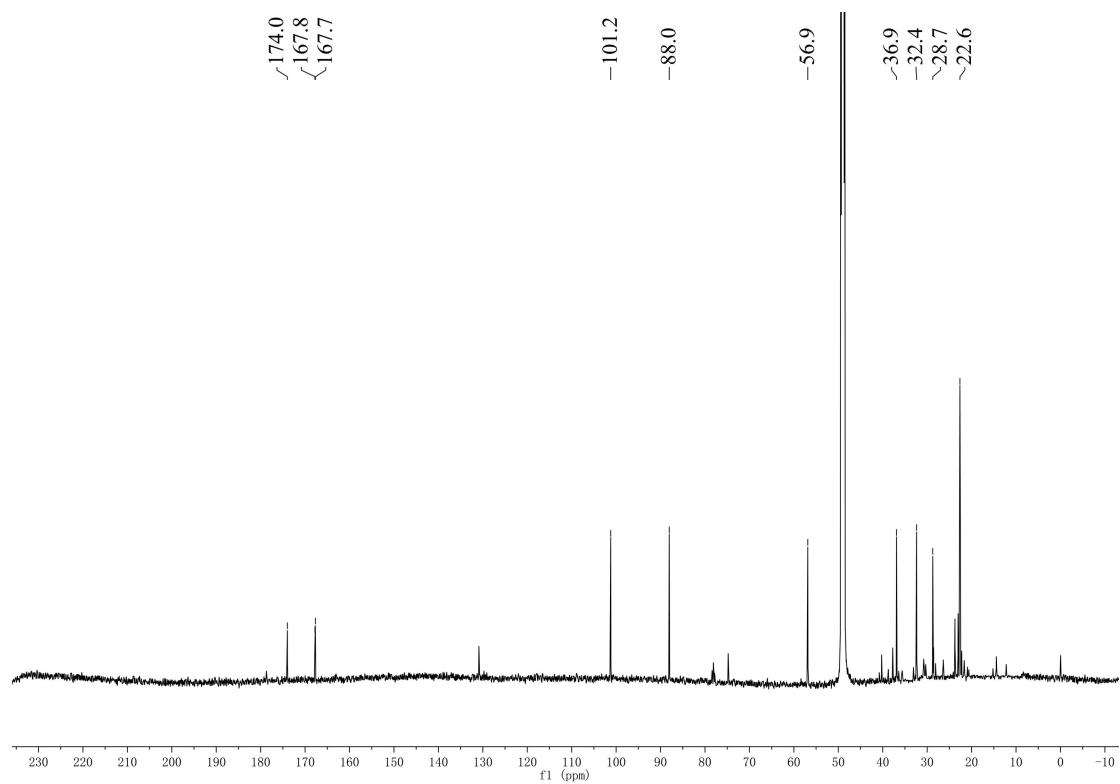

**Figure S31.**  $^{13}\text{C}$ -DEPT NMR (175 MHz, methanol- $d_4$ ) spectrum of minipyrone (**10**).

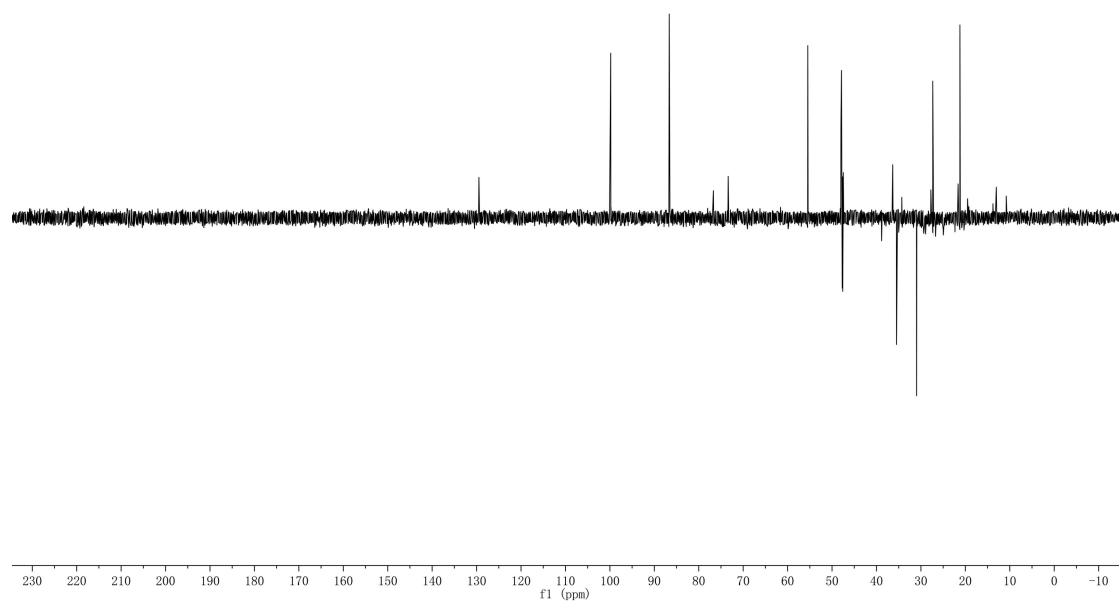

**Figure S32.**  $^1\text{H}$ - $^1\text{H}$  COSY spectrum of minipyrone (**10**).

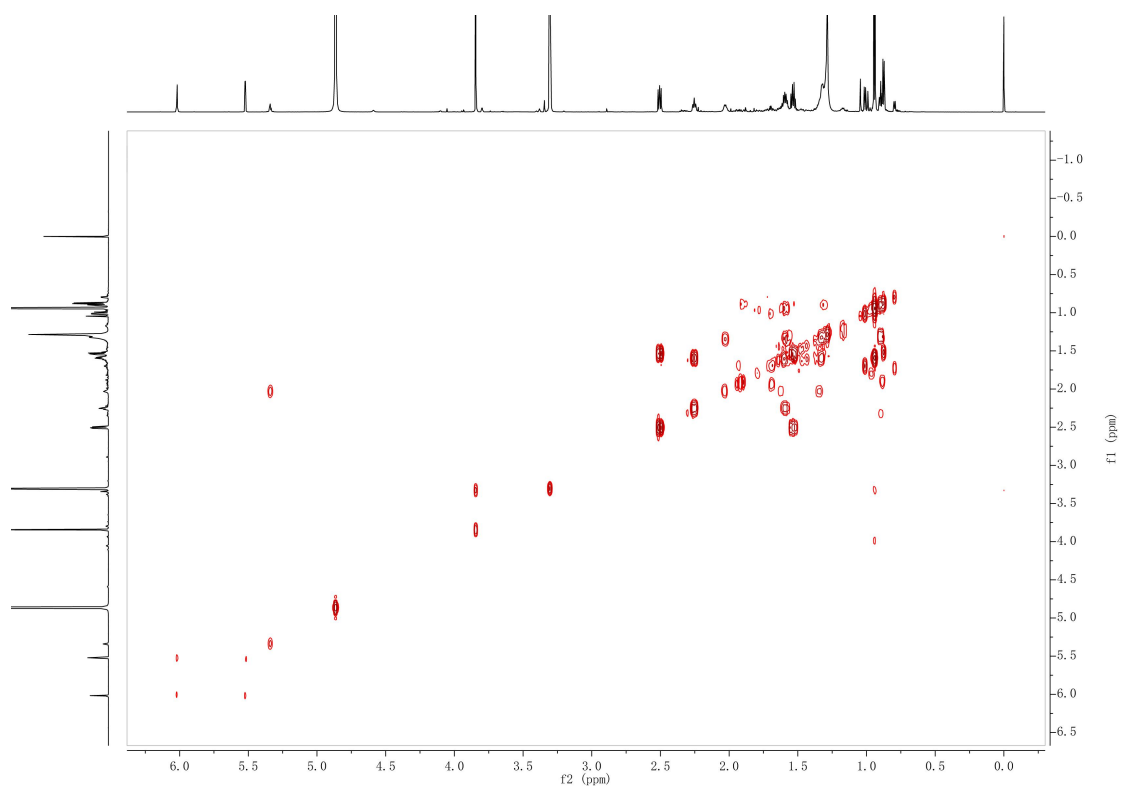

**Figure S33.** HSQC spectrum of minipyrone (**10**).

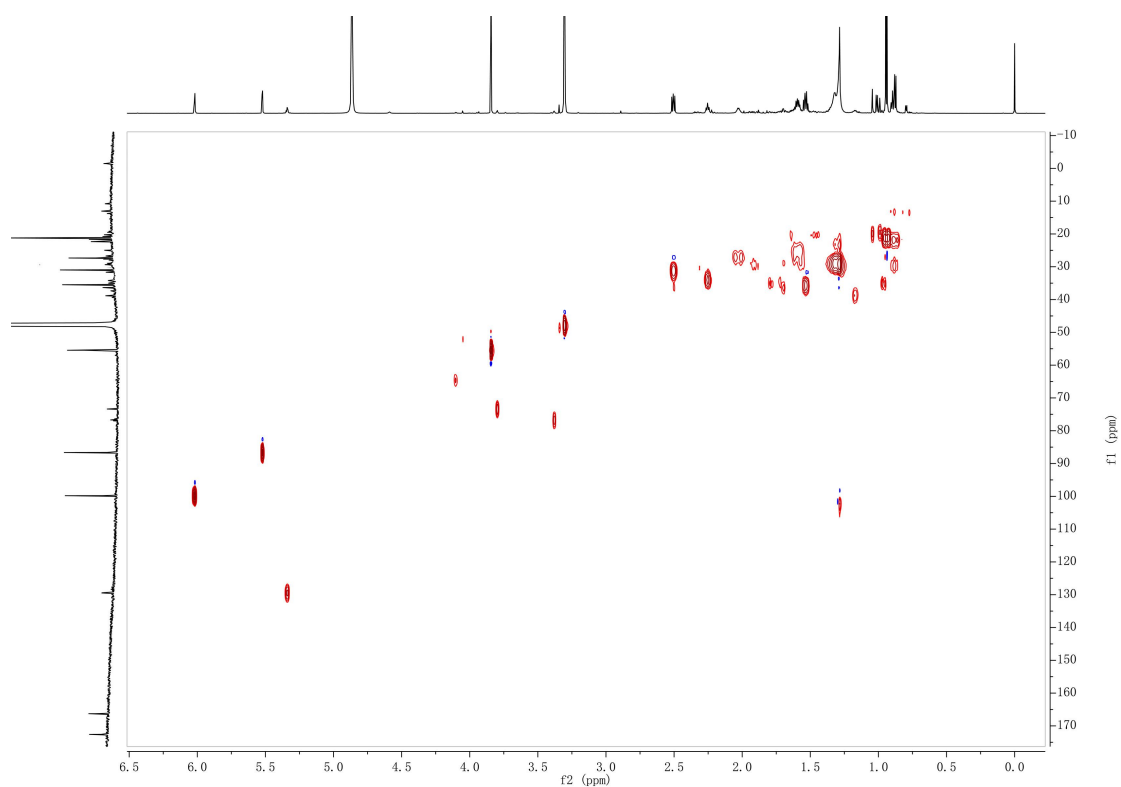

**Figure S34.** HMBC spectrum of minipyrone (**10**).

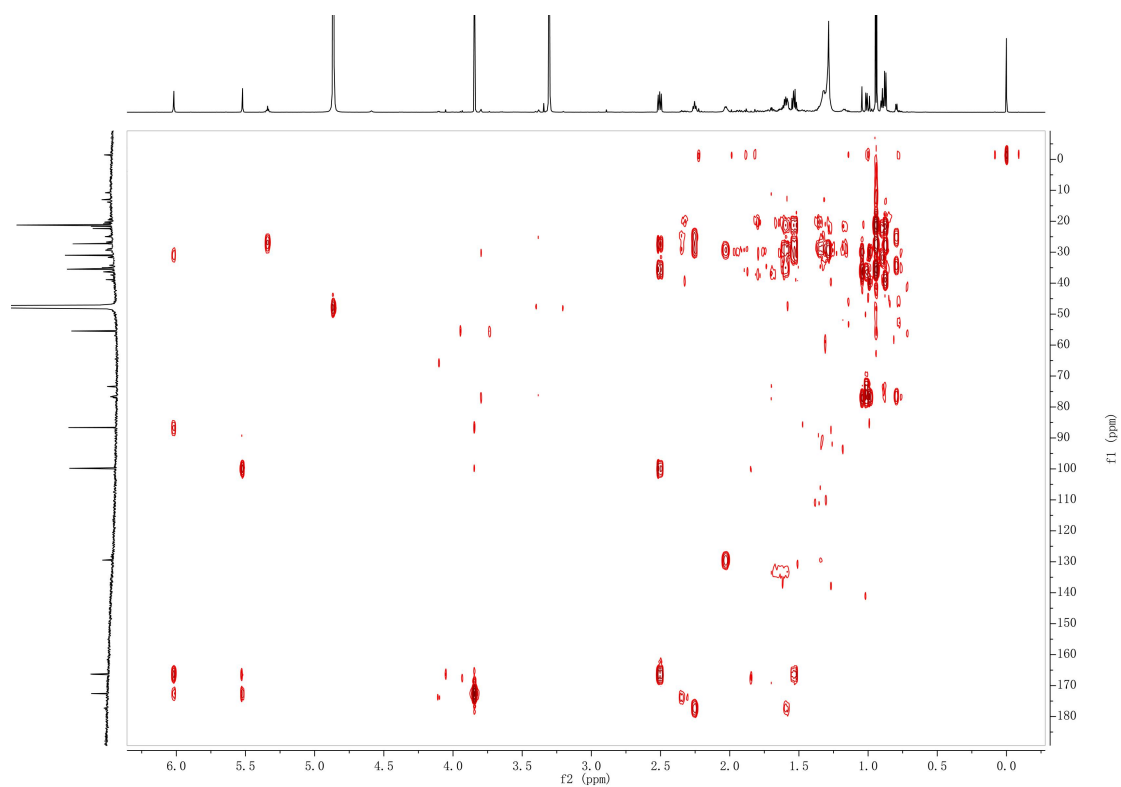

**Figure S35.** NOESY spectrum of minipyrone (**10**).

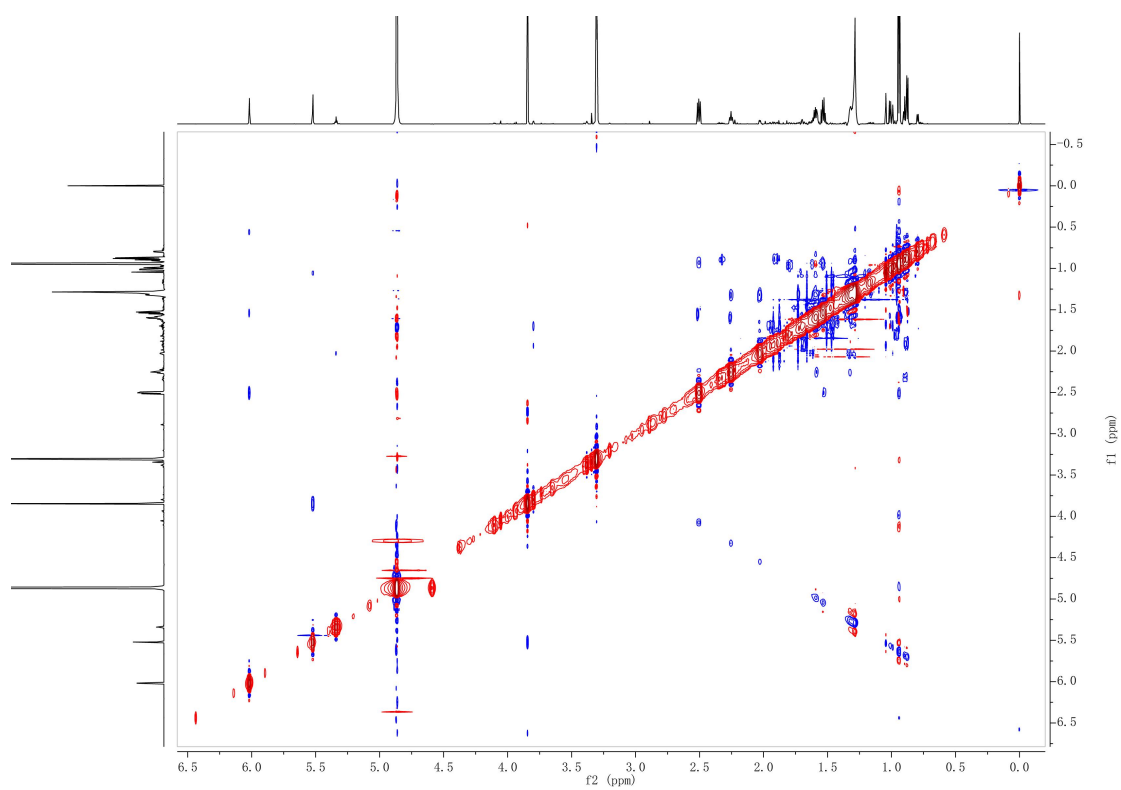



**Figure S36.** The HPLC-DAD and HRESIMS data of crude extract from *Streptomyces* sp. SCSIO ZS0520.

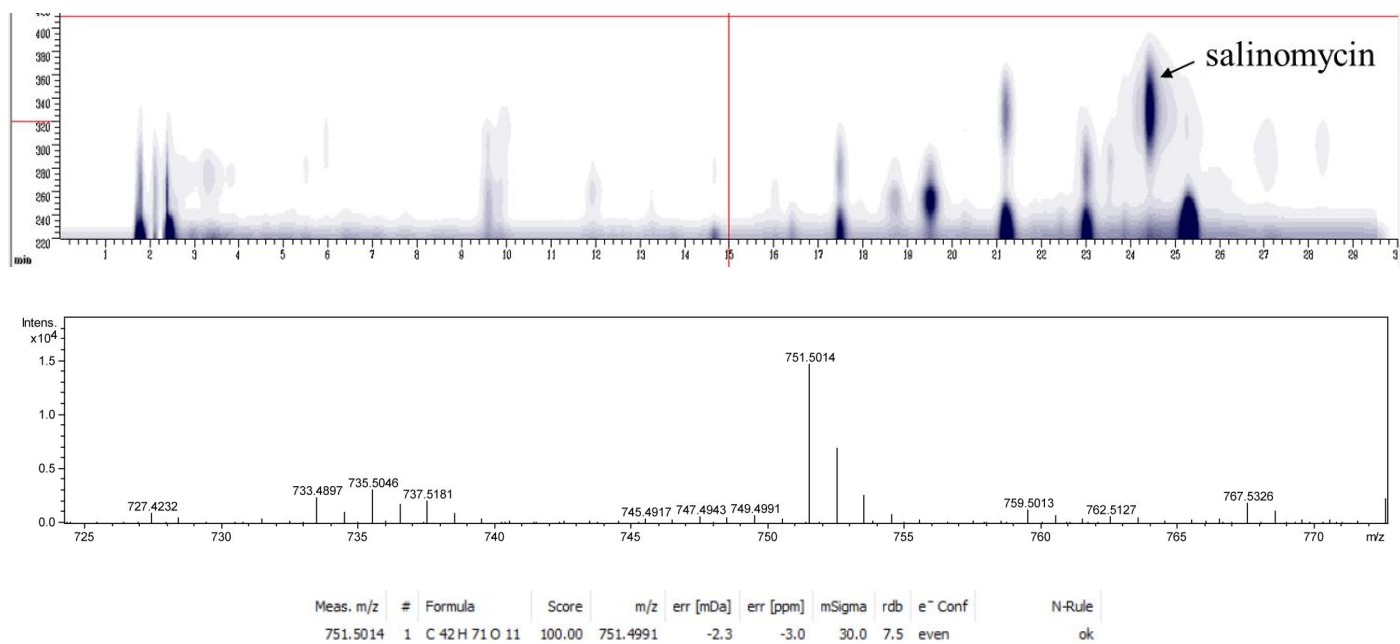

Supplement: s1 [file s1]
